# Supplementary material for: Presence of TMPRSS2-ERG is associated with alterations of the metabolic profile in human prostate cancer
Source: PubMed Central journal article supplement (PMC5173117; doi:10.18632/oncotarget.9817), 2016-06-03
Supplement: oncotarget-07-42071-s001.pdf [file oncotarget-07-42071-s001.pdf]

## Presence of TMPRSS2-ERG is associated with alterations of the metabolic profile in human prostate cancer

### Supplementary Materials

**Supplementary Table S1: Sample distribution per patient in the main cohort classified as ERG<sub>low</sub>, ERG<sub>intermediate</sub> and ERG<sub>high</sub>**

| Patient | Benign | ERG <sub>low</sub> | ERG <sub>intermediate</sub> | ERG <sub>high</sub> | Total |
|---------|--------|--------------------|-----------------------------|---------------------|-------|
| 1       | 1      | 0                  | 0                           | 2                   | 3     |
| 2       | 1      | 0                  | 3                           | 1                   | 5     |
| 3       | 1      | 0                  | 0                           | 2                   | 3     |
| 4       | 1      | 0                  | 1                           | 1                   | 3     |
| 5       | 1      | 0                  | 1                           | 1                   | 3     |
| 6       | 0      | 1                  | 1                           | 2                   | 4     |
| 7       | 1      | 0                  | 0                           | 2                   | 3     |
| 8       | 0      | 0                  | 0                           | 4                   | 4     |
| 9       | 0      | 2                  | 0                           | 0                   | 2     |
| 10      | 1      | 3                  | 1                           | 0                   | 5     |
| 11      | 1      | 1                  | 2                           | 1                   | 5     |
| 12      | 1      | 1                  | 2                           | 0                   | 4     |
| 13      | 1      | 0                  | 1                           | 0                   | 2     |
| 14      | 0      | 0                  | 2                           | 0                   | 2     |
| 15      | 1      | 1                  | 0                           | 1                   | 3     |
| 16      | 2      | 0                  | 1                           | 2                   | 5     |
| 17      | 1      | 0                  | 0                           | 1                   | 2     |
| 18      | 1      | 0                  | 1                           | 2                   | 4     |
| 19      | 0      | 0                  | 0                           | 3                   | 3     |
| 20      | 1      | 3                  | 0                           | 0                   | 4     |
| 21      | 1      | 2                  | 0                           | 0                   | 3     |
| 22      | 1      | 0                  | 1                           | 1                   | 3     |
| 23      | 1      | 1                  | 2                           | 0                   | 4     |
| 24      | 0      | 0                  | 0                           | 2                   | 2     |
| 25      | 1      | 0                  | 0                           | 0                   | 1     |
| 26      | 1      | 1                  | 0                           | 0                   | 2     |
| 27      | 1      | 1                  | 0                           | 0                   | 2     |
| 28      | 1      | 0                  | 0                           | 0                   | 1     |
| 29      | 1      | 1                  | 1                           | 0                   | 3     |
| 30      | 2      | 2                  | 0                           | 0                   | 4     |
| 31      | 1      | 1                  | 0                           | 0                   | 2     |
| 32      | 1      | 1                  | 0                           | 0                   | 2     |

|       |    |    |    |    |     |
|-------|----|----|----|----|-----|
| 33    | 1  | 0  | 0  | 0  | 1   |
| 34    | 0  | 1  | 2  | 0  | 3   |
| 35    | 0  | 1  | 1  | 3  | 5   |
| 36    | 2  | 1  | 0  | 0  | 3   |
| 37    | 1  | 2  | 2  | 1  | 6   |
| 38    | 0  | 0  | 2  | 1  | 3   |
| 39    | 1  | 1  | 1  | 1  | 4   |
| 40    | 1  | 2  | 0  | 0  | 3   |
| 41    | 0  | 0  | 3  | 0  | 3   |
| Total | 34 | 30 | 31 | 34 | 129 |

**Supplementary Table S2: Differences in levels of quantified metabolites in the main cohort comparing ERG<sub>high</sub> samples to ERG<sub>low</sub> samples**

| Metabolites     | Benign<br>n = 34                                           |                                                            | ERG <sub>low</sub><br>n = 30                               |                                                            | ERG <sub>intermediate</sub><br>n = 31                      |                                                            | ERG <sub>high</sub><br>n = 34 |          | ERG <sub>high</sub><br>vs<br>ERG <sub>low</sub><br>p-values* | p-trend** | Corrected<br>for<br>stromal<br>content | Corrected<br>for cancer<br>content | Corrected<br>for benign<br>epithelial<br>content | Corrected<br>for<br>luminal<br>space<br>content |
|-----------------|------------------------------------------------------------|------------------------------------------------------------|------------------------------------------------------------|------------------------------------------------------------|------------------------------------------------------------|------------------------------------------------------------|-------------------------------|----------|--------------------------------------------------------------|-----------|----------------------------------------|------------------------------------|--------------------------------------------------|-------------------------------------------------|
|                 | Concentrations<br>mmoles/kg wet<br>weight, median<br>(IQR) | Concentrations<br>mmoles/kg wet<br>weight, median<br>(IQR) | Concentrations<br>mmoles/kg wet<br>weight, median<br>(IQR) | Concentrations<br>mmoles/kg wet<br>weight, median<br>(IQR) | Concentrations<br>mmoles/kg wet<br>weight, median<br>(IQR) | Concentrations<br>mmoles/kg wet<br>weight, median<br>(IQR) |                               |          |                                                              |           |                                        |                                    |                                                  |                                                 |
| Alanine         | 1.74 (1.32 to 2.09)                                        | 2.18 (1.75 to 2.79)                                        | 2.16 (1.65 to 2.57)                                        | 2.48 (1.78 to 2.85)                                        | 0.711                                                      | 0.866                                                      | 0.611                         | 0.876    | 0.929                                                        | 0.744     | 0.666                                  |                                    |                                                  |                                                 |
| Choline         | 0.45 (0.28 to 0.61)                                        | 0.99 (0.59 to 1.43)                                        | 1.01 (0.65 to 1.68)                                        | 1.23 (0.89 to 1.51)                                        | 0.126                                                      | 0.29                                                       | 0.116                         | 0.096    | 0.102                                                        | 0.043     | 0.038                                  |                                    |                                                  |                                                 |
| Citrate         | 8.45 (4.62 to 11.85)                                       | 9.44 (5.56 to 14.68)                                       | 6.74 (3.94 to 10.34)                                       | 3.91 (2.59 to 7.20)                                        | <0.001                                                     | <0.001                                                     | <0.001                        | 5.60E-06 | 2.20E-05                                                     | 6.10E-05  | 5.80E-05                               |                                    |                                                  |                                                 |
| Creatine        | 2.51 (1.97 to 3.06)                                        | 2.27 (1.65 to 2.70)                                        | 2.10 (1.82 to 2.55)                                        | 2.00 (1.64 to 2.54)                                        | 0.953                                                      | 1                                                          | 0.546                         | 0.913    | 0.817                                                        | 0.666     | 0.729                                  |                                    |                                                  |                                                 |
| Ethm            | 0 (0 to 0.18)                                              | 0 (0 to 0)                                                 | 0 (0 to 0.15)                                              | 0.01 (0 to 0.31)                                           | 0.49                                                       | 0.663                                                      | 0.043                         | 0.421    | 0.352                                                        | 0.238     | 0.326                                  |                                    |                                                  |                                                 |
| Glucose         | 0.78 (0.47 to 1.25)                                        | 0.15 (0.00 to 0.63)                                        | 0.00 (0.00 to 0.43)                                        | 0.00 (0.00 to 0.07)                                        | 0.008                                                      | 0.061                                                      | 0.007                         | 0.012    | 0.021                                                        | 0.014     | 6.40E-03                               |                                    |                                                  |                                                 |
| Glutamate       | 2.73 (2.42 to 3.53)                                        | 4.60 (4.02 to 6.11)                                        | 4.75 (3.55 to 6.88)                                        | 5.98 (4.26 to 7.79)                                        | 0.139                                                      | 0.291                                                      | 0.101                         | 0.133    | 0.244                                                        | 0.116     | 0.049                                  |                                    |                                                  |                                                 |
| Glutamine       | 2.05 (1.58 to 2.35)                                        | 2.57 (2.27 to 3.41)                                        | 2.82 (2.14 to 3.50)                                        | 3.05 (2.61 to 3.70)                                        | 0.422                                                      | 0.647                                                      | 0.12                          | 0.485    | 0.281                                                        | 0.413     | 0.3                                    |                                    |                                                  |                                                 |
| Glycine         | 1.55 (1.28 to 1.98)                                        | 1.99 (1.68 to 2.78)                                        | 2.51 (1.98 to 3.18)                                        | 2.90 (1.93 to 3.65)                                        | 0.023                                                      | 0.115                                                      | 0.008                         | 5.70E-03 | 1.00E-02                                                     | 6.10E-03  | 4.00E-03                               |                                    |                                                  |                                                 |
| GPC             | 0.41 (0.25 to 0.50)                                        | 0.76 (0.49 to 1.28)                                        | 0.73 (0.43 to 1.41)                                        | 0.90 (0.60 to 1.17)                                        | 1                                                          | 1                                                          | 0.865                         | 0.72     | 0.563                                                        | 0.823     | 0.653                                  |                                    |                                                  |                                                 |
| GPE             | 0.23 (0 to 0.43)                                           | 0.17 (0 to 0.55)                                           | 0.03 (0 to 0.51)                                           | 0 (0 to 0.72)                                              | 0.999                                                      | 1                                                          | 0.94                          | 0.913    | 0.862                                                        | 0.909     | 0.831                                  |                                    |                                                  |                                                 |
| Isoleucine      | 0.09 (0 to 0.12)                                           | 0.17 (0.03 to 0.24)                                        | 0.15 (0.06 to 0.29)                                        | 0.19 (0.11 to 0.31)                                        | 0.097                                                      | 0.248                                                      | 0.138                         | 0.024    | 0.014                                                        | 0.022     | 0.05                                   |                                    |                                                  |                                                 |
| Lactate         | 13.93 (10.35 to 16.54)                                     | 21.92 (16.52 to 25.63)                                     | 20.52 (13.61 to 26.41)                                     | 17.34 (15.69 to 22.01)                                     | 0.34                                                       | 0.602                                                      | 0.166                         | 0.148    | 0.134                                                        | 0.178     | 0.174                                  |                                    |                                                  |                                                 |
| Leucine         | 0.24 (0.16 to 0.36)                                        | 0.38 (0.30 to 0.60)                                        | 0.46 (0.32 to 0.70)                                        | 0.51 (0.37 to 0.70)                                        | 0.715                                                      | 0.866                                                      | 0.168                         | 0.746    | 0.788                                                        | 0.598     | 0.668                                  |                                    |                                                  |                                                 |
| Myo-inositol    | 9.06 (8.01 to 10.67)                                       | 10.03 (6.92 to 11.67)                                      | 9.13 (7.16 to 12.66)                                       | 8.97 (7.23 to 10.56)                                       | 0.49                                                       | 0.663                                                      | 0.294                         | 0.373    | 0.431                                                        | 0.454     | 0.475                                  |                                    |                                                  |                                                 |
| PCh             | 0.32 (0.16 to 0.60)                                        | 0.61 (0.33 to 0.91)                                        | 0.63 (0.43 to 1.17)                                        | 0.96 (0.64 to 1.36)                                        | 0.067                                                      | 0.248                                                      | 0.005                         | 0.017    | 0.027                                                        | 0.026     | 0.018                                  |                                    |                                                  |                                                 |
| PE              | 1.73 (1.09 to 2.59)                                        | 2.33 (1.46 to 3.51)                                        | 2.57 (1.67 to 4.14)                                        | 2.86 (2.33 to 3.79)                                        | 0.087                                                      | 0.248                                                      | 0.032                         | 0.02     | 0.029                                                        | 0.042     | 0.045                                  |                                    |                                                  |                                                 |
| Putrescine      | 0.44 (0 to 1.34)                                           | 0.12 (0 to 0.67)                                           | 0.06 (0 to 0.30)                                           | 0 (0 to 0.10)                                              | 0.025                                                      | 0.115                                                      | 0.003                         | 2.20E-03 | 4.00E-03                                                     | 7.70E-03  | 6.40E-03                               |                                    |                                                  |                                                 |
| Seyllo-inositol | 0.33 (0.25 to 0.56)                                        | 0.39 (0.31 to 0.59)                                        | 0.50 (0.37 to 0.63)                                        | 0.47 (0.37 to 0.61)                                        | 0.087                                                      | 0.248                                                      | 0.438                         | 4.50E-03 | 5.50E-03                                                     | 0.029     | 0.067                                  |                                    |                                                  |                                                 |
| Spermine        | 1.69 (0.90 to 2.71)                                        | 2.10 (1.20 to 3.19)                                        | 1.23 (0.79 to 2.02)                                        | 0.89 (0.45 to 1.40)                                        | <0.001                                                     | <0.001                                                     | <0.001                        | 7.20E-06 | 3.10E-05                                                     | 9.90E-05  | 7.00E-05                               |                                    |                                                  |                                                 |
| Succinate       | 0.37 (0.30 to 0.47)                                        | 0.60 (0.43 to 0.74)                                        | 0.62 (0.44 to 0.89)                                        | 0.63 (0.49 to 0.88)                                        | 0.412                                                      | 0.647                                                      | 0.446                         | 0.401    | 0.433                                                        | 0.247     | 0.181                                  |                                    |                                                  |                                                 |
| Taurine         | 5.74 (3.98 to 6.27)                                        | 5.39 (3.90 to 6.96)                                        | 4.84 (3.48 to 7.09)                                        | 4.26 (3.28 to 5.54)                                        | 0.168                                                      | 0.322                                                      | 0.097                         | 0.117    | 0.167                                                        | 0.14      | 0.071                                  |                                    |                                                  |                                                 |
| Valine          | 0.21 (0.18 to 0.29)                                        | 0.35 (0.27 to 0.50)                                        | 0.39 (0.22 to 0.49)                                        | 0.39 (0.26 to 0.53)                                        | 0.972                                                      | 1                                                          | 0.666                         | 0.975    | 0.983                                                        | 0.847     | 0.999                                  |                                    |                                                  |                                                 |

Ethm: Ethanolamine, GPC: Glycerophosphoethanolamine, GPE: Glycerophosphoethanolamine, PCh: Phosphocholine, PE: Phosphoethanolamine.

\*Benjamini-Hochberg adjusted values, \*\*trend across increasing ERG groups (not including benign samples).

**Supplementary Table S3: Differences in levels of quantified metabolites in the main cohort, comparing all ERG groups to benign samples and ERG<sub>low</sub> to ERG<sub>intermediate</sub> and ERG<sub>intermediate</sub> to ERG<sub>high</sub>**

| Metabolites     | Benign vs ERG <sub>low</sub> | Benign vs ERG <sub>intermediate</sub> | Benign vs ERG <sub>high</sub> | ERG <sub>low</sub> vs ERG <sub>int</sub> | ERG <sub>int</sub> vs ERG <sub>high</sub> |
|-----------------|------------------------------|---------------------------------------|-------------------------------|------------------------------------------|-------------------------------------------|
|                 | <i>p</i> -value              | <i>p</i> -value                       | <i>p</i> -value               | <i>p</i> -value                          | <i>p</i> -value                           |
| Alanine         | 2.80E-03                     | 0.044                                 | 5.30E-03                      | 0.728                                    | 0.779                                     |
| Choline         | 9.70E-06                     | 1.70E-07                              | 8.70E-09                      | 0.035                                    | 0.687                                     |
| Citrate         | 0.334                        | 0.099                                 | 1.30E-04                      | 0.015                                    | 0.19                                      |
| Creatine        | 0.692                        | 0.995                                 | 0.342                         | 0.282                                    | 0.518                                     |
| Ethm            | 0.161                        | 0.476                                 | 0.739                         | 0.356                                    | 0.633                                     |
| Glucose         | 5.40E-06                     | 4.50E-11                              | 1.40E-14                      | 0.094                                    | 0.374                                     |
| Glutamate       | 4.30E-09                     | 7.00E-10                              | 4.50E-13                      | 0.15                                     | 0.239                                     |
| Glutamine       | 6.80E-04                     | 1.90E-03                              | 1.30E-06                      | 0.332                                    | 0.381                                     |
| Glycine         | 6.30E-03                     | 1.60E-04                              | 2.10E-07                      | 0.091                                    | 0.39                                      |
| GPC             | 1.10E-09                     | 2.20E-07                              | 1.50E-06                      | 0.32                                     | 0.316                                     |
| GPE             | 0.986                        | 0.604                                 | 0.84                          | 0.601                                    | 0.945                                     |
| Isoleucine      | 0.109                        | 0.015                                 | 3.60E-04                      | 0.254                                    | 0.177                                     |
| Lactate         | 8.70E-08                     | 6.00E-06                              | 1.00E-04                      | 0.881                                    | 0.386                                     |
| Leucine         | 2.50E-04                     | 2.80E-07                              | 1.60E-05                      | 0.719                                    | 0.847                                     |
| Myo-inositol    | 0.286                        | 0.222                                 | 0.751                         | 0.927                                    | 0.327                                     |
| PCh             | 9.00E-03                     | 1.80E-06                              | 1.00E-08                      | 0.077                                    | 0.273                                     |
| PE              | 1.60E-03                     | 4.40E-06                              | 2.90E-08                      | 0.238                                    | 0.501                                     |
| Putrescine      | 0.261                        | 7.80E-03                              | 5.70E-05                      | 0.03                                     | 0.939                                     |
| Scyllo-inositol | 0.372                        | 0.608                                 | 0.688                         | 0.963                                    | 0.492                                     |
| Spermine        | 0.118                        | 0.201                                 | 3.80E-05                      | 0.035                                    | 0.086                                     |
| Succinate       | 0.016                        | 0.019                                 | 4.70E-06                      | 0.243                                    | 0.838                                     |
| Taurine         | 0.796                        | 0.489                                 | 0.104                         | 0.827                                    | 0.035                                     |
| Valine          | 0.065                        | 0.152                                 | 0.02                          | 0.764                                    | 0.359                                     |

Ethm: Ethanolamine, GPC: Glycerophosphocholine, GPE: Glycerophosphoethanolamine.  
 GSH: Glutathione, PCh: Phosphocholine, PE: Phosphoethanolamine.

**Supplementary Table S4: Differences in levels of quantified metabolites in the validation cohort comparing TMPRSS2–ERG positive and negative patients**

| Metabolites     | TMPRSS2:ERG negative                      | TMPRSS2:ERG positive                      | <i>p</i> -value | <i>p</i> -value* |
|-----------------|-------------------------------------------|-------------------------------------------|-----------------|------------------|
|                 | <i>n</i> = 33                             | <i>n</i> = 7                              |                 |                  |
|                 | Concentrations mmoles/kg wet weight (IQR) | Concentrations mmoles/kg wet weight (IQR) |                 |                  |
| Alanine         | 2.51 (2.07 to 2.88)                       | 2.13 (1.59 to 2.51)                       | 0.202           | 0.721            |
| Ascorbate       | 0.06 (0.00 to 0.06)                       | 0.08 (0.00 to 0.22)                       | 0.487           | 0.84             |
| Choline         | 0.96 (0.79 to 1.19)                       | 0.79 (0.40 to 0.99)                       | 0.148           | 0.617            |
| Citrate         | 6.74 (3.88 to 8.74)                       | 3.05 (1.25 to 4.69)                       | 0.013           | 0.263            |
| Creatine        | 3.01 (2.61 to 3.51)                       | 2.69 (2.14 to 3.66)                       | 0.293           | 0.775            |
| Ethm            | 0.22 (0.00 to 0.36)                       | 0.00 (0.00 to 0.00)                       | 0.088           | 0.55             |
| Glucose         | 0.39 (0.00 to 0.77)                       | 0.55 (0.00 to 1.56)                       | 0.805           | 0.957            |
| Glutamate       | 4.08 (3.12 to 4.62)                       | 3.94 (3.45 to 4.64)                       | 0.832           | 0.957            |
| Glutamine       | 2.09 (1.61 to 2.47)                       | 2.09 (1.78 to 2.55)                       | 0.919           | 0.957            |
| Glycine         | 2.37 (1.92 to 2.86)                       | 2.41 (1.54 to 2.64)                       | 0.857           | 0.957            |
| GPC             | 0.90 (0.52 to 1.14)                       | 0.85 (0.48 to 1.21)                       | 0.905           | 0.957            |
| GPE             | 0.13 (0.00 to 0.16)                       | 0.18 (0.00 to 0.07)                       | 0.099           | 0.55             |
| GSH             | 0.84 (0.74 to 1.04)                       | 0.86 (0.64 to 1.13)                       | 0.898           | 0.957            |
| Isoleucine      | 0.17 (0.09 to 0.25)                       | 0.13 (0.08 to 0.16)                       | 0.413           | 0.794            |
| Lactate         | 16.01 (12.74 to 18.12)                    | 15.92 (12.34 to 20.40)                    | 0.959           | 0.959            |
| Leucine         | 0.36 (0.22 to 0.47)                       | 0.40 (0.27 to 0.38)                       | 0.571           | 0.892            |
| Myo–inositol    | 8.82 (7.31 to 10.05)                      | 8.10 (7.09 to 8.90)                       | 0.504           | 0.84             |
| PCh             | 0.62 (0.31 to 0.81)                       | 0.85 (0.63 to 0.98)                       | 0.11            | 0.55             |
| PE              | 2.34 (1.82 to 2.78)                       | 2.68 (2.18 to 2.80)                       | 0.282           | 0.775            |
| Putrescine      | 0.17 (0.00 to 0.27)                       | 0.06 (0.00 to 0.00)                       | 0.348           | 0.791            |
| Scyllo–inositol | 0.60 (0.38 to 0.78)                       | 0.48 (0.34 to 0.47)                       | 0.381           | 0.794            |
| Spermine        | 0.69 (0.38 to 0.81)                       | 0.31 (0.10 to 0.52)                       | <b>0.021</b>    | 0.263            |
| Succinate       | 0.54 (0.40 to 0.69)                       | 0.46 (0.37 to 0.57)                       | 0.31            | 0.775            |
| Taurine         | 5.81 (4.83 to 7.06)                       | 5.66 (5.16 to 6.80)                       | 0.869           | 0.957            |
| Valine          | 0.48 (0.41 to 0.50)                       | 0.46 (0.39 to 0.49)                       | 0.81            | 0.957            |

Ethm: Ethanolamine, GPC: Glycerophosphocholine, GPE: Glycerophosphoethanolamine, GSH: Glutathione, PCh: Phosphocholine, PE: Phosphoethanolamine \*Benjamini-Hochberg corrected for multiple testing.

**Supplementary Table S5: Differences in expression levels of key metabolic genes comparing ERG<sub>high</sub> and ERG<sub>low</sub> in the main cohort, including estimated means and adjusted for benign epithelia, stroma, cancer and luminal space**

| Gene  | Estimated/predicted means med 95 % CI |                      | <i>p</i> -value | <i>p</i> -value* | Adjusted for benign epithelial content | Adjusted for stromal content | Adjusted for cancer content | Adjusted for luminal space content |
|-------|---------------------------------------|----------------------|-----------------|------------------|----------------------------------------|------------------------------|-----------------------------|------------------------------------|
|       | ERG <sub>low</sub>                    | ERG <sub>high</sub>  |                 |                  |                                        |                              |                             |                                    |
| ACACA | 9.81 (9.67, 9.94)                     | 10.10 (9.97, 10.24)  | 9.80E-04        | 0.003            | 2.50E-03                               | 1.50E-03                     | 3.10E-03                    | 4.70E-04                           |
| ACO1  | 9.71 (9.61, 9.82)                     | 9.40 (9.30, 9.51)    | 2.50E-06        | 6.09E-05         | 6.30E-06                               | 6.00E-06                     | 1.40E-05                    | 2.60E-06                           |
| ACO2  | 8.06 (7.97, 8.15)                     | 7.93 (7.85, 8.02)    | 0.036           | 0.065            | 0.031                                  | 0.013                        | 0.014                       | 0.046                              |
| ACSL1 |                                       |                      | 0.683           | 0.683            | 0.715                                  | 0.593                        | 0.606                       | 0.64                               |
| ACSL3 | 10.78 (10.59, 10.97)                  | 11.07 (10.88, 11.26) | 5.80E-03        | 0.014            | 1.40E-03                               | 4.80E-03                     | 1.50E-03                    | 8.80E-03                           |
| ACSL4 | 7.08 (6.95, 7.22)                     | 6.82 (6.69, 6.95)    | 3.80E-03        | 0.010            | 6.90E-03                               | 6.20E-03                     | 0.012                       | 4.00E-03                           |
| ACSL5 | 6.20 (5.85, 6.55)                     | 6.67 (6.33, 7.01)    | 0.045           | 0.073            | 0.021                                  | 0.035                        | 0.018                       | 0.045                              |
| ACSL6 |                                       |                      | 0.264           | 0.320            | 0.312                                  | 0.209                        | 0.247                       | 0.171                              |
| AGXT1 |                                       |                      | 0.155           | 0.208            | 0.193                                  | 0.215                        | 0.255                       | 0.139                              |
| ALDOA | 9.33 (9.15, 9.50)                     | 8.79 (8.62, 8.96)    | 1.40E-05        | 1.89E-04         | 2.40E-05                               | 2.20E-05                     | 4.80E-05                    | 1.90E-05                           |
| ALDOB | 6.03 (5.85, 6.20)                     | 6.37 (6.20, 6.55)    | 3.40E-03        | 0.009            | 3.40E-03                               | 6.50E-03                     | 8.40E-03                    | 9.70E-04                           |
| ALDOC |                                       |                      | 0.38            | 0.420            | 0.43                                   | 0.546                        | 0.636                       | 0.311                              |
| AMD1  | 6.93 (6.73, 7.13)                     | 7.28 (7.08, 7.48)    | 3.40E-03        | 0.009            | 1.70E-03                               | 4.50E-03                     | 2.80E-03                    | 2.70E-03                           |
| CHKA  | 8.10 (7.99, 8.21)                     | 8.42 (8.32, 8.53)    | 1.60E-05        | 1.89E-04         | 2.70E-05                               | 2.00E-05                     | 3.10E-05                    | 2.50E-05                           |
| CS    |                                       |                      | 0.148           | 0.203            | 0.175                                  | 0.144                        | 0.161                       | 0.12                               |
| DLD   | 7.83 (7.71, 7.94)                     | 7.59 (7.47, 7.71)    | 3.40E-04        | 0.001            | 6.10E-04                               | 4.60E-04                     | 7.70E-04                    | 8.40E-04                           |
| DLST  |                                       |                      | 0.132           | 0.189            | 0.115                                  | 0.074                        | 0.054                       | 0.14                               |
| ENO1  | 11.39 (11.29, 11.49)                  | 11.64 (11.55, 11.74) | 8.10E-05        | 4.78E-04         | 1.70E-04                               | 1.20E-04                     | 2.10E-04                    | 9.90E-05                           |
| FASN  | 11.62 (11.36, 11.87)                  | 11.98 (11.72, 12.23) | 0.015           | 0.030            | 0.014                                  | 0.017                        | 0.015                       | 6.80E-03                           |
| FH    |                                       |                      | 0.549           | 0.567            | 0.58                                   | 0.365                        | 0.361                       | 0.853                              |
| G6PD  | 6.95 (6.86, 7.04)                     | 7.08 (6.99, 7.17)    | 0.033           | 0.061            | 0.037                                  | 0.044                        | 0.053                       | 0.028                              |
| GAPDH |                                       |                      | 0.285           | 0.339            | 0.33                                   | 0.392                        | 0.446                       | 0.181                              |
| GPI   |                                       |                      | 0.652           | 0.663            | 0.75                                   | 0.818                        | 0.906                       | 0.559                              |
| HK1   |                                       |                      | 0.06            | 0.095            | 0.057                                  | 0.033                        | 0.033                       | 0.063                              |
| HK2   |                                       |                      | 0.241           | 0.298            | 0.053                                  | 0.121                        | 0.025                       | 0.344                              |
| IDH1  |                                       |                      | 0.324           | 0.378            | 0.415                                  | 0.323                        | 0.394                       | 0.157                              |
| IDH2  |                                       |                      | 0.191           | 0.241            | 0.164                                  | 0.231                        | 0.215                       | 0.15                               |
| IDH3A |                                       |                      | 0.338           | 0.380            | 0.322                                  | 0.281                        | 0.253                       | 0.404                              |
| IDH3B | 8.92 (8.84, 8.99)                     | 8.74 (8.67, 8.82)    | 3.70E-04        | 0.001            | 4.40E-04                               | 5.70E-04                     | 6.90E-04                    | 4.10E-04                           |
| IDH3G |                                       |                      | 0.119           | 0.179            | 0.179                                  | 0.17                         | 0.279                       | 0.081                              |
| LDHA  |                                       |                      | 0.178           | 0.229            | 0.223                                  | 0.258                        | 0.315                       | 0.239                              |
| LDHB  | 9.41 (9.13, 9.68)                     | 8.77 ( 8.50, 9.05)   | 1.90E-04        | 9.21E-04         | 4.00E-04                               | 2.80E-04                     | 5.20E-04                    | 3.00E-06                           |
| MDH1  | 10.33 (10.22, 10.45)                  | 10.19 (10.07, 10.30) | 0.041           | 0.068            | 0.036                                  | 0.082                        | 0.079                       | 7.30E-03                           |
| MDH2  | 11.93 (11.86, 12.00)                  | 12.10 (12.03, 12.16) | 4.00E-05        | 3.60E-04         | 2.60E-05                               | 6.90E-05                     | 6.10E-05                    | 2.80E-05                           |

|               |                      |                         |          |          |          |          |          |          |
|---------------|----------------------|-------------------------|----------|----------|----------|----------|----------|----------|
| <b>NPY</b>    | 10.93 (10.18, 11.68) | 13.24<br>(12.50, 13.98) | 2.90E-06 | 6.09E-05 | 1.60E-06 | 3.30E-06 | 2.10E-06 | 6.10E-06 |
| <b>OAZ</b>    |                      |                         | 0.17     | 0.223    | 0.177    | 0.174    | 0.091    | 0.587    |
| <b>ODC</b>    | 10.75 (10.49, 11.01) | 11.12 (10.85,<br>11.38) | 0.012    | 0.024    | 0.013    | 0.032    | 0.04     | 7.50E-03 |
| <b>OGDH</b>   |                      |                         | 0.075    | 0.115    | 0.056    | 0.092    | 0.079    | 0.071    |
| <b>OGDHL</b>  | 6.13 (5.94, 6.32)    | 7.48 (7.29, 7.66)       | 7.70E-29 | 4.85E-27 | 2.50E-33 | 2.10E-28 | 2.80E-30 | 5.90E-28 |
| <b>PDHA</b>   | 8.55 (8.47, 8.62)    | 8.69 (8.62, 8.76)       | 7.90E-03 | 0.018    | 0.011    | 9.70E-03 | 0.014    | 8.90E-03 |
| <b>PDHB</b>   |                      |                         | 0.448    | 0.487    | 0.479    | 0.384    | 0.418    | 0.424    |
| <b>PGD</b>    | 8.41 (8.29, 8.53)    | 8.66 (8.54, 8.77)       | 2.80E-04 | 0.001    | 4.30E-04 | 6.20E-04 | 1.20E-03 | 5.70E-04 |
| <b>PGK1</b>   | 10.36 (10.23, 10.50) | 10.04 (9.91,<br>10.17)  | 7.70E-05 | 4.78E-04 | 1.00E-04 | 6.10E-05 | 9.50E-05 | 3.40E-05 |
| <b>PGLS</b>   | 8.69 (8.58, 8.79)    | 8.94 (8.84, 9.04)       | 9.10E-05 | 4.78E-04 | 1.80E-04 | 2.20E-04 | 4.40E-04 | 1.70E-05 |
| <b>PGLS</b>   | 8.69 (8.59, 8.79)    | 8.94 (8.84, 9.04)       | 9.10E-05 | 4.78E-04 | 1.80E-04 | 2.20E-04 | 4.40E-04 | 1.70E-05 |
| <b>PGM1</b>   | 9.56 (9.40, 9.73)    | 9.19 (9.03, 9.36)       | 1.10E-03 | 0.003    | 1.80E-03 | 1.70E-03 | 3.40E-03 | 1.20E-03 |
| <b>PKM2</b>   | 9.20 (9.09, 9.31)    | 9.36 (9.26, 9.47)       | 0.027    | 0.052    | 0.027    | 0.028    | 0.027    | 0.025    |
| <b>RBKS</b>   | 6.82 (6.73, 6.91)    | 7.05 (6.97, 7.14)       | 2.50E-04 | 0.001    | 6.10E-04 | 3.50E-04 | 8.10E-04 | 3.20E-04 |
| <b>RPE</b>    |                      |                         | 0.335    | 0.380    | 0.332    | 0.244    | 0.24     | 0.443    |
| <b>RPIA</b>   | 7.44 (7.30, 7.58)    | 7.62 (7.49, 7.76)       | 0.04     | 0.068    | 0.051    | 0.06     | 0.075    | 4.40E-03 |
| <b>SAT1</b>   | 12.27 (12.12, 12.43) | 12.64 (12.49,<br>12.80) | 4.00E-04 | 0.001    | 1.30E-04 | 2.40E-04 | 9.80E-05 | 1.30E-03 |
| <b>SDHA</b>   | 8.67 (8.59, 8.74)    | 8.55 (8.47, 8.62)       | 0.012    | 0.024    | 0.013    | 0.016    | 0.017    | 0.015    |
| <b>SDHB</b>   |                      |                         | 0.548    | 0.567    | 0.492    | 0.528    | 0.584    | 0.609    |
| <b>SDHC</b>   |                      |                         | 0.132    | 0.189    | 0.139    | 0.287    | 0.161    | 0.216    |
| <b>SDHD</b>   | 7.59 (7.44, 7.75)    | 7.33 (7.17, 7.48)       | 0.011    | 0.024    | 0.012    | 0.013    | 0.311    | 6.50E-03 |
| <b>SHMT1</b>  | 7.01 (6.9, 7.2)      | 7.31 (7.16, 7.46)       | 0.003    | 0.009    | 0.003    | 0.001    | 0.002    | 2.00E-03 |
| <b>SMOX</b>   | 7.15 (6.86, 7.43)    | 7.75 (7.47, 8.03)       | 1.80E-05 | 1.89E-04 | 3.00E-05 | 2.50E-05 | 4.00E-05 | 1.10E-06 |
| <b>SMS</b>    | 9.73 (9.46, 10.00)   | 9.37 (9.10, 9.64)       | 0.041    | 0.068    | 0.019    | 0.011    | 4.60E-03 | 0.067    |
| <b>SRM</b>    | 8.06 (7.94, 8.19)    | 8.30 (8.17, 8.42)       | 6.20E-03 | 0.014    | 0.011    | 9.00E-03 | 0.015    | 5.20E-03 |
| <b>SUCLG</b>  |                      |                         | 0.148    | 0.203    | 0.165    | 0.137    | 0.142    | 0.198    |
| <b>TALDO1</b> |                      |                         | 0.506    | 0.540    | 0.637    | 0.461    | 0.552    | 0.473    |
| <b>TKT</b>    | 9.46 (9.31, 9.61)    | 9.86 (9.71, 10.01)      | 4.80E-05 | 3.78E-04 | 1.10E-04 | 1.00E-04 | 2.50E-04 | 6.20E-06 |
| <b>TPI1</b>   | 9.69 (9.52, 9.86)    | 9.30 (9.14, 9.47)       | 4.50E-04 | 0.001    | 7.60E-04 | 7.00E-04 | 1.10E-03 | 7.00E-04 |

ACACA: Acetyl-CoA carboxylase alpha, ACO1: Aconitase 1, ACO2: Aconitase 2, ACSL1: Acyl-CoA synthetase 1, ACSL3: Acyl-CoA synthetase 3, ACSL4: Acyl-CoA synthetase 4, ACSL5: Acyl-CoA synthetase 5, ACSL6: Acyl-CoA synthetase 6, AGXT1: Alanine-glyoxylate aminotransferase 1, ALDOA: Aldolase A, ALDOB: Aldolase B, ALDOC: Aldolase C, AMD1: Adenosylmethionine decarboxylase, CHKA: Choline kinase alpha, CS: Citrate synthase, DLD: Dihydrolipoamide dehydrogenase, DLST: Dihydrolipoamides-succinyltransferase, ENO1: Enolase 1, FASN: Fatty acid synthase, FH: Fumarate hydratase, G6PD: Glucose-6-phosphate dehydrogenase, GAPDH: Glyceraldehyde-3-phosphatedehydrogenase, GPI: Glucose-6-phosphate isomerase, HK1: Hexokinase 1, HK2: Hexokinase 2, IDH1: Isocitrate dehydrogenase 1, IDH2: Isocitrate dehydrogenase 2, IDH3A: Isocitrate dehydrogenase 3A, IDH3B: Isocitrate dehydrogenase 3B, IDH3G: Isocitrate dehydrogenase 3G, MDH1: Malate dehydrogenase 1, MDH2: Malate dehydrogenase 2, NPY: Neuropeptide Y, OAZ: Ornithine decarboxylase antizyme, ODC: Ornithine decarboxylase, OGDH: Oxoglutarate (alpha-ketoglutarate) dehydrogenase, OGDHL: Oxoglutarate dehydrogenase-like, PDHA: Pyruvate dehydrogenase alpha, PDHB: Pyruvate dehydrogenase beta, PGK1: Phosphoglycerate kinase, PGD: Phosphogluconate dehydrogenase, PGLS: 6-phosphogluconolactonase, PGM1: Phosphoglucomutase, PKM2: Pyruvate kinase, RBKS: Ribokinase, RPE: Ribulose-5-phosphate-3-epimerase, RPIA: Ribose 5-phosphate isomerase, SAT1: Spermidine/spermine-N1-acetyltransferase 1, SDHA: Succinate dehydrogenase complex, subunit A, SDHB: Succinate dehydrogenase complex, subunit B, SDHD: Succinate dehydrogenase complex, subunit D, SHMT1: Serine hydroxymethyltransferase 1, SMOX: Spermine oxidase, SMS: Spermine synthase, SRM: Spermidine synthase, SUCLG: Succinyl-CoA ligase, TALDO1: Transaldolase 1, TKT: Transketolase, TPI1: Triosephosphate isomerase 1. Since the gene expression values were log<sub>2</sub> transformed, a difference in expression by one unit corresponds to a twofold mean change in probe intensities. \*Benjamini-Hochberg corrected.

**Supplementary Table S6: Differences in expression levels of key metabolic genes comparing ERG<sub>high</sub> and ERG<sub>low</sub> in low Gleason (Gleason ≤ 3 + 4) samples in the main cohort, including estimated means and adjusted for benign epithelia, stroma, cancer and luminal space**

| Gene  | Estimated/predicted means<br>med 95 % CI |                      | <i>p</i> -value | <i>p</i> -value* | Adjusted<br>for benign<br>epithelial<br>content | Adjusted<br>for<br>stromal<br>content | Adjusted<br>for cancer<br>content | Adjusted<br>for luminal<br>space<br>content |
|-------|------------------------------------------|----------------------|-----------------|------------------|-------------------------------------------------|---------------------------------------|-----------------------------------|---------------------------------------------|
|       | ERG <sub>low</sub>                       | ERG <sub>high</sub>  |                 |                  |                                                 |                                       |                                   |                                             |
| ACACA | 9.81 (9.64, 9.98)                        | 10.19 (10.04, 10.33) | 2.90E-04        | 0.001            | 0.247                                           | 0.55                                  | 0.355                             | 0.22                                        |
| ACO1  | 9.70 (9.58, 9.83)                        | 9.47 (9.36, 9.58)    | 4.20E-03        | 0.010            | 0.016                                           | 0.026                                 | 8.90E-03                          | 0.041                                       |
| ACO2  | 8.12 (8.01, 8.23)                        | 7.91 (7.81, 8.00)    | 2.80E-03        | 0.007            | 0.016                                           | 7.60E-04                              | 4.40E-03                          | 0.016                                       |
| ACSL1 | 9.30 (8.99, 9.60)                        | 8.86 (8.59, 9.13)    | 0.017           | 0.029            | 0.026                                           | 0.072                                 | 0.078                             | 0.028                                       |
| ACSL3 |                                          |                      | 0.294           | 0.331            | 1.06E-01                                        | 0.062                                 | 6.00E-02                          | 8.70E-02                                    |
| ACSL4 | 7.18 (7.01, 7.35)                        | 6.76 (6.62, 6.91)    | 1.80E-04        | 7.56E-04         | 0.552                                           | 0.647                                 | 0.615                             | 0.617                                       |
| ACSL5 |                                          |                      | 0.248           | 0.284            | 6.40E-05                                        | 0.029                                 | 1.90E-04                          | 2.10E-04                                    |
| ACSL6 |                                          |                      | 0.826           | 0.853            | 0.14                                            | 0.136                                 | 0.22                              | 0.488                                       |
| AGXT1 |                                          |                      | 0.951           | 0.957            | 3.70E-07                                        | 4.40E-06                              | 6.30E-07                          | 4.30E-07                                    |
| ALDOA | 9.39 (9.14, 9.63)                        | 8.74 (8.53, 8.94)    | 5.80E-05        | 3.32E-04         | 8.90E-03                                        | 0.022                                 | 0.015                             | 0.015                                       |
| ALDOB | 6.06 (5.82, 6.30)                        | 6.45 (6.25, 6.65)    | 0.014           | 0.025            | 2.00E-04                                        | 2.80E-04                              | 5.20E-05                          | 2.00E-05                                    |
| ALDOC | 7.43384 (7.29, 7.58)                     | 7.05 (6.92, 7.19)    | 3.30E-06        | 2.97E-05         | 0.526                                           | 0.563                                 | 0.62                              | 0.497                                       |
| AMD1  | 6.93 (6.66, 7.21)                        | 7.35 (7.11, 7.59)    | 0.013           | 0.024            | 3.70E-05                                        | 3.70E-05                              | 2.40E-05                          | 4.70E-05                                    |
| CHKA  |                                          |                      | 0.129           | 0.159            | 4.30E-03                                        | 6.20E-05                              | 6.30E-05                          | 1.10E-04                                    |
| CS    |                                          |                      | 0.638           | 0.681            | 4.10E-03                                        | 9.70E-03                              | 5.50E-03                          | 5.50E-03                                    |
| DLD   | 7.89 (7.73, 8.04)                        | 7.55 (7.41, 7.70)    | 2.00E-06        | 2.10E-05         | 1.40E-04                                        | 4.70E-04                              | 1.70E-04                          | 8.80E-05                                    |
| DLST  |                                          |                      | 0.321           | 0.355            | 1.10E-04                                        | 2.40E-13                              | 3.70E-04                          | 2.50E-11                                    |
| ENO1  | 11.29 (11.15, 11.43)                     | 11.63 (11.51, 11.74) | 2.60E-04        | 0.001            | 1.50E-06                                        | 1.50E-11                              | 8.70E-03                          | 1.50E-06                                    |
| FASN  |                                          |                      | 0.066           | 0.099            | 1.30E-04                                        | 2.10E-03                              | 2.90E-04                          | 2.50E-04                                    |
| FH    |                                          |                      | 0.957           | 0.957            | 2.10E-03                                        | 3.20E-03                              | 3.50E-03                          | 3.50E-03                                    |
| G6PD  |                                          |                      | 0.111           | 0.143            | 0.767                                           | 0.319                                 | 0.564                             | 0.942                                       |
| GAPDH | 11.36 (11.22, 11.51)                     | 11.59 (11.47, 11.72) | 7.00E-03        | 0.015            | 7.90E-04                                        | 6.30E-07                              | 3.40E-03                          | 2.60E-08                                    |
| GPI   |                                          |                      | 0.406           | 0.441            | 0.15                                            | 0.02                                  | 0.049                             | 0.06                                        |
| HK1   | 5.99 (5.86, 6.12)                        | 5.78 (5.67, 5.90)    | 0.015           | 0.026            | 0.03                                            | 4.00E-03                              | 4.00E-03                          | 4.40E-04                                    |
| HK2   |                                          |                      | 0.077           | 0.108            | 2.30E-03                                        | 5.40E-03                              | 6.40E-03                          | 1.30E-03                                    |
| IDH1  | 9.06 (8.76, 9.37)                        | 8.64 (8.37, 8.91)    | 0.02            | 0.033            | 0.011                                           | 0.011                                 | 0.012                             | 6.90E-03                                    |
| IDH2  | 9.03 (8.87, 9.18)                        | 9.23 (9.09, 9.36)    | 0.038           | 0.058            | 0.081                                           | 0.144                                 | 0.104                             | 0.108                                       |
| IDH3A |                                          |                      | 0.184           | 0.223            | 3.50E-03                                        | 6.10E-06                              | 1.50E-03                          | 3.40E-05                                    |
| IDH3B | 8.91 (8.82, 9.01)                        | 8.75 (8.67, 8.84)    | 9.80E-03        | 0.019            | 0.017                                           | 0.011                                 | 0.091                             | 2.10E-03                                    |
| IDH3G | 8.43 (8.31, 8.54)                        | 8.74 (8.63, 8.84)    | 2.60E-08        | 4.10E-07         | 0.032                                           | 7.20E-03                              | 0.019                             | 0.017                                       |
| LDHA  |                                          |                      | 0.072           | 0.105            | 3.60E-04                                        | 0.073                                 | 0.027                             | 0.045                                       |
| LDHB  | 9.44 (9.05, 9.83)                        | 8.83 (8.49, 9.17)    | 0.012           | 0.023            | 0.039                                           | 0.14                                  | 0.227                             | 0.028                                       |
| MDH1  | 10.34 (10.18, 10.50)                     | 10.15 (10.01, 10.29) | 0.038           | 0.058            | 0.227                                           | 0.023                                 | 0.077                             | 0.068                                       |
| MDH2  | 11.89 (11.80, 11.99)                     | 12.14 (12.06, 12.22) | 4.10E-05        | 2.58E-04         | 3.60E-05                                        | 2.30E-04                              | 4.50E-05                          | 6.00E-05                                    |
| NPY   | 10.41 (9.34, 11.48)                      | 13.24 (12.33, 14.15) | 6.40E-05        | 3.36E-04         | 4.70E-04                                        | 8.20E-07                              | 3.00E-03                          | 3.70E-06                                    |
| OAZ   | 6.57 (6.33, 6.81)                        | 6.38 (6.15, 6.62)    | 3.10E-03        | 0.008            | 0.123                                           | 0.029                                 | 0.026                             | 0.08                                        |
| ODC   | 10.68 (10.28, 11.09)                     | 11.22 (10.86, 11.58) | 0.028           | 0.045            | 9.10E-23                                        | 5.50E-23                              | 2.50E-21                          | 1.80E-24                                    |
| OGDH  | 8.35 (8.24, 8.47)                        | 8.54 (8.44, 8.64)    | 8.60E-03        | 0.017            | 0.062                                           | 0.055                                 | 0.044                             | 0.07                                        |
| OGDHL | 5.95 (5.70, 6.21)                        | 7.62 (7.41, 7.84)    | 3.40E-24        | 2.14E-22         | 4.80E-04                                        | 9.40E-04                              | 2.40E-03                          | 6.30E-05                                    |
| PDHA  |                                          |                      | 0.096           | 0.129            | 4.60E-07                                        | 2.50E-12                              | 4.60E-07                          | 4.70E-13                                    |
| PDHB  |                                          |                      | 0.107           | 0.140            | 2.20E-04                                        | 1.30E-03                              | 4.40E-04                          | 4.40E-04                                    |
| PGD   | 8.38 (8.23, 8.52)                        | 8.70 (8.59, 8.82)    | 3.30E-04        | 0.001            | 3.60E-04                                        | 3.40E-04                              | 2.40E-04                          | 3.00E-04                                    |



|               |                      |                      |          |          |          |          |          |          |
|---------------|----------------------|----------------------|----------|----------|----------|----------|----------|----------|
| <b>PGK1</b>   | 10.36 (10.15, 10.57) | 9.97 (9.79, 10.16)   | 4.40E-03 | 0.010    | 0.133    | 0.164    | 0.107    | 0.186    |
| <b>PGLS</b>   | 8.69 (8.54, 8.84)    | 8.97 (8.84, 9.10)    | 2.10E-03 | 0.006    | 0.017    | 0.019    | 0.045    | 0.015    |
| <b>PGLS</b>   | 8.69 (8.54, 8.84)    | 8.97 (8.84, 9.10)    | 2.10E-03 | 0.006    | 0.37     | 0.974    | 0.732    | 0.407    |
| <b>PGM1</b>   | 9.64 (9.41, 9.88)    | 9.15 (8.95, 9.35)    | 1.80E-03 | 0.005    | 0.123    | 0.211    | 0.12     | 0.1      |
| <b>PKM2</b>   | 9.06 (8.95, 9.18)    | 9.43 (9.32, 9.54)    | 2.90E-13 | 9.14E-12 | 4.10E-03 | 0.01     | 7.30E-03 | 3.80E-03 |
| <b>RBKS</b>   | 6.73 (6.60, 6.86)    | 7.05 (6.94, 7.16)    | 3.80E-04 | 0.001    | 0.062    | 0.087    | 0.079    | 0.063    |
| <b>RPE</b>    |                      |                      | 0.755    | 0.793    | 5.90E-04 | 1.90E-04 | 3.10E-03 | 3.90E-05 |
| <b>RPIA</b>   |                      |                      | 0.241    | 0.281    | 9.50E-04 | 1.90E-03 | 3.60E-03 | 2.00E-03 |
| <b>SAT1</b>   | 12.05 (11.82, 12.27) | 12.64 (12.45, 12.83) | 9.10E-05 | 4.10E-04 | 0.123    | 0.22     | 0.16     | 0.116    |
| <b>SDHA</b>   | 8.70 (8.63, 8.78)    | 8.53 (8.46, 8.60)    | 3.30E-05 | 2.31E-04 | 0.966    | 0.901    | 0.92     | 0.955    |
| <b>SDHB</b>   |                      |                      | 0.206    | 0.245    | 9.80E-03 | 0.148    | 0.25     | 0.012    |
| <b>SDHC</b>   | 7.75 (7.53, 7.96)    | 7.30 (7.11, 7.49)    | 9.00E-04 | 0.003    | 0.951    | 0.703    | 0.716    | 0.957    |
| <b>SDHD</b>   | 7.72 (7.52, 7.92)    | 7.19 (7.01, 7.37)    | 8.90E-06 | 7.01E-05 | 0.814    | 0.931    | 0.873    | 0.915    |
| <b>SHMT1</b>  |                      |                      | 0.077    | 0.108    | 2.30E-03 | 5.40E-03 | 6.40E-03 | 1.30E-03 |
| <b>SMOX</b>   | 7.21 (6.92, 7.51)    | 8.08 (7.80, 8.36)    | 1.40E-11 | 2.94E-10 | 3.10E-03 | 6.50E-04 | 1.80E-03 | 2.90E-03 |
| <b>SMS</b>    |                      |                      | 0.094    | 0.129    | 1.10E-03 | 5.00E-03 | 1.70E-03 | 2.10E-03 |
| <b>SRM</b>    | 8.06 (7.90, 8.21)    | 8.35 (8.22, 8.47)    | 5.00E-03 | 0.011    | 9.50E-03 | 0.017    | 0.011    | 0.01     |
| <b>SUCLG</b>  | 9.62 (9.49, 9.75)    | 9.32 (9.20, 9.44)    | 7.40E-05 | 3.59E-04 | 0.012    | 0.014    | 0.011    | 0.017    |
| <b>TALDO1</b> |                      |                      | 0.122    | 0.154    | 0.221    | 0.383    | 0.4      | 0.228    |
| <b>TKT</b>    | 9.30 (9.07, 9.52)    | 10.00 (9.80, 10.19)  | 8.10E-07 | 1.02E-05 | 0.1      | 0.36     | 0.177    | 0.447    |
| <b>TPI1</b>   | 9.73 (9.50, 9.95)    | 9.29 (9.10, 9.48)    | 3.30E-03 | 0.008    | 0.088    | 0.019    | 0.092    | 0.01     |

ACACA: Acetyl-CoA carboxylase alpha, ACO1: Aconitase 1, ACO2: Aconitase 2, ACSL1: Acyl-CoA synthetase 1, ACSL3: Acyl-CoA synthetase 3, ACSL4: Acyl-CoA synthetase 4, ACSL5: Acyl-CoA synthetase 5, ACSL6: Acyl-CoA synthetase 6, AGXT1: Alanine-glyoxylate aminotransferase 1, ALDOA: Aldolase A, ALDOB: Aldolase B, ALDOC: Aldolase C, AMD1: Adenosylmethionine decarboxylase, CHKA: Choline kinase alpha, CS: Citrate synthase, DLD: Dihydrolipoamide dehydrogenase, DLST: Dihydrolipoamides-succinyltransferase, ENO1: Enolase 1, FASN: Fatty acid synthase, FH: Fumarate hydratase, G6PD: Glucose-6-phosphate dehydrogenase, GAPDH: Glyceraldehyde-3-phosphatedehydrogenase, GPI: Glucose-6-phosphate isomerase, HK1: Hexokinase 1, HK2: Hexokinase 2, IDH1: Isocitrate dehydrogenase 1, IDH2: Isocitrate dehydrogenase 2, IDH3A: Isocitrate dehydrogenase 3A, IDH3B: Isocitrate dehydrogenase 3B, IDH3G: Isocitrate dehydrogenase 3G, MDH1: Malate dehydrogenase 1, MDH2: Malate dehydrogenase 2, NPY: Neuropeptide Y, OAZ: Ornithine decarboxylase antizyme, ODC: Ornithine decarboxylase, OGDH: Oxoglutarate (alpha-ketoglutarate) dehydrogenase, OGDHL: Oxoglutarate dehydrogenase-like, PDHA: Pyruvate dehydrogenase alpha, PDHB: Pyruvate dehydrogenase beta, PGK1: Phosphoglycerate kinase, PGD: Phosphogluconate dehydrogenase, PGLS: 6-phosphogluconolactonase, PGM1: Phosphoglucomutase, PKM2: Pyruvate kinase, RBKS: Ribokinase, RPE: Ribulose-5-phosphate-3-epimerase, RPIA: Ribose 5-phosphate isomerase, SAT1: Spermidine/spermine-N1-acetyltransferase 1, SDHA: Succinate dehydrogenase complex, subunit A, SDHB: Succinate dehydrogenase complex, subunit B, SDHD: Succinate dehydrogenase complex, subunit D, SHMT1: Serine hydroxymethyltransferase 1, SMOX: Spermine oxidase, SMS: Spermine synthase, SRM: Spermidine synthase, SUCLG: Succinyl-CoA ligase, TALDO1: Transaldolase 1, TKT: Transketolase, TPI1: Triosephosphate isomerase 1. Since the gene expression values were log2 transformed, a difference in expression by one unit corresponds to a twofold mean change in probe intensities. \*Benjamini-Hochberg corrected.

**Supplementary Table S7: Differences in expression levels of key metabolic genes comparing ERG<sub>high</sub> and ERG<sub>low</sub> in high Gleason (Gleason  $\geq 4 + 3$ ) samples in the main cohort, including estimated means and adjusted for benign epithelia, stroma, cancer and luminal space**

| Gene  | Estimated/predicted means<br>% CI | med 95               | <i>p</i> -value | <i>p</i> -value* | Adjusted<br>for benign<br>epithelial<br>content | Adjusted<br>for<br>stromal<br>content | Adjusted<br>for cancer<br>content | Adjusted<br>for luminal<br>space<br>content |
|-------|-----------------------------------|----------------------|-----------------|------------------|-------------------------------------------------|---------------------------------------|-----------------------------------|---------------------------------------------|
|       | ERG <sub>low</sub>                | ERG <sub>high</sub>  |                 |                  |                                                 |                                       |                                   |                                             |
| ACACA |                                   |                      | 0.054           | 0.144            | 0.741                                           | 0.55                                  | 0.794                             | 0.431                                       |
| ACO1  | 9.68 (9.52, 9.84)                 | 9.37 (9.21, 9.52)    | 1.10E-03        | 0.023            | 0.402                                           | 0.699                                 | 0.395                             | 0.708                                       |
| ACO2  |                                   |                      | 0.253           | 0.349            | 0.247                                           | 0.01                                  | 0.047                             | 5.00E-03                                    |
| ACSL1 |                                   |                      | 0.444           | 0.519            | 0.665                                           | 0.418                                 | 0.488                             | 0.386                                       |
| ACSL3 | 10.55 (10.32, 10.78)              | 10.89 (10.66, 11.11) | 0.017           | 0.082            | 0.048                                           | 0.094                                 | 0.107                             | 0.036                                       |
| ACSL4 |                                   |                      | 0.201           | 0.288            | 0.247                                           | 0.01                                  | 0.047                             | 5.00E-03                                    |
| ACSL5 |                                   |                      | 0.055           | 0.144            | 0.277                                           | 0.395                                 | 0.365                             | 0.363                                       |
| ACSL6 |                                   |                      | 0.099           | 0.164            | 0.94                                            | 0.837                                 | 0.769                             | 0.964                                       |
| AGXT1 |                                   |                      | 0.062           | 0.147            | 0.143                                           | 0.06                                  | 0.16                              | 0.998                                       |
| ALDOA | 9.27(9.03, 9.51)                  | 8.88 (8.63, 9.12)    | 0.022           | 0.089            | 0.273                                           | 0.25                                  | 0.238                             | 0.175                                       |
| ALDOB |                                   |                      | 0.079           | 0.158            | 0.133                                           | 0.633                                 | 0.204                             | 0.829                                       |
| ALDOC |                                   |                      | 0.382           | 0.491            | 0.167                                           | 0.191                                 | 0.17                              | 0.158                                       |
| AMD1  |                                   |                      | 0.085           | 0.158            | 0.932                                           | 0.738                                 | 0.632                             | 0.95                                        |
| CHKA  | 8.96 (8.83, 9.09)                 | 9.44 (9.30, 9.57)    | 6.60E-07        | 2.08E-05         | 0.015                                           | 1.20E-03                              | 2.90E-03                          | 2.10E-03                                    |
| CS    |                                   |                      | 0.255           | 0.349            | 0.444                                           | 0.063                                 | 0.432                             | 0.055                                       |
| DLD   |                                   |                      | 0.088           | 0.158            | 7.00E-03                                        | 1.20E-03                              | 6.60E-04                          | 0.025                                       |
| DLST  | 6.89 (6.70, 7.07)                 | 7.28 (7.09, 7.46)    | 1.50E-03        | 0.024            | 0.539                                           | 0.433                                 | 0.57                              | 0.44                                        |
| ENO1  | 11.47 (11.35, 11.59)              | 11.66 (11.53, 11.78) | 0.024           | 0.089            | 5.80E-04                                        | 7.20E-04                              | 1.70E-04                          | 1.30E-04                                    |
| FASN  |                                   |                      | 0.115           | 0.186            | 1.30E-10                                        | 1.20E-10                              | 4.60E-11                          | 1.10E-10                                    |
| FH    |                                   |                      | 0.596           | 0.636            | 0.891                                           | 0.174                                 | 0.383                             | 0.123                                       |
| G6PD  |                                   |                      | 0.194           | 0.284            | 0.468                                           | 0.123                                 | 0.309                             | 0.228                                       |
| GAPDH |                                   |                      | 0.531           | 0.589            | 0.035                                           | 0.018                                 | 0.013                             | 0.01                                        |
| GPI   |                                   |                      | 0.533           | 0.589            | 9.40E-03                                        | 6.80E-03                              | 0.011                             | 1.60E-03                                    |
| HK1   |                                   |                      | 0.394           | 0.496            | 0.18                                            | 0.081                                 | 0.143                             | 7.60E-03                                    |
| HK2   |                                   |                      | 0.453           | 0.519            | 0.774                                           | 0.896                                 | 0.771                             | 0.931                                       |
| IDH1  |                                   |                      | 0.43            | 0.519            | 0.062                                           | 0.188                                 | 0.155                             | 0.239                                       |
| IDH2  |                                   |                      | 0.063           | 0.147            | 0.167                                           | 0.448                                 | 0.27                              | 0.483                                       |
| IDH3A |                                   |                      | 0.093           | 0.160            | 8.40E-03                                        | 3.30E-03                              | 2.90E-03                          | 3.30E-03                                    |
| IDH3B | 8.92 (8.81, 9.03)                 | 8.70 (8.59, 8.81)    | 4.30E-03        | 0.039            | 1.10E-03                                        | 0.057                                 | 0.011                             | 0.042                                       |
| IDH3G |                                   |                      | 0.592           | 0.636            | 0.012                                           | 0.064                                 | 0.014                             | 0.102                                       |
| LDHA  |                                   |                      | 0.307           | 0.403            | 0.733                                           | 0.03                                  | 0.118                             | 0.041                                       |
| LDHB  | 9.39 (9.02, 9.75)                 | 8.77 (8.40, 9.13)    | 0.011           | 0.063            | 0.034                                           | 0.092                                 | 0.205                             | 6.20E-03                                    |
| MDH1  |                                   |                      | 0.903           | 0.918            | 0.308                                           | 0.083                                 | 0.179                             | 0.029                                       |
| MDH2  |                                   |                      | 0.077           | 0.158            | 0.023                                           | 0.081                                 | 0.04                              | 0.13                                        |
| NPY   | 11.48 (10.49, 12.48)              | 13.35 (12.36, 14.34) | 3.80E-03        | 0.039            | 0.888                                           | 0.156                                 | 0.544                             | 0.285                                       |
| OAZ   | 5.30 (5.12, 5.48)                 | 4.92 (4.75, 5.10)    | 3.20E-03        | 0.039            | 0.012                                           | 0.018                                 | 0.014                             | 0.016                                       |
| ODC   |                                   |                      | 0.084           | 0.158            | 0.106                                           | 0.011                                 | 0.03                              | 1.10E-03                                    |

|               |                      |                      |          |          |          |          |          |          |
|---------------|----------------------|----------------------|----------|----------|----------|----------|----------|----------|
| <b>OGDH</b>   |                      |                      | 0.805    | 0.831    | 0.964    | 0.798    | 0.755    | 0.626    |
| <b>OGDHL</b>  | 6.33 (6.06, 6.60)    | 7.32 (7.06, 7.59)    | 1.70E-10 | 1.07E-08 | 0.747    | 0.053    | 0.135    | 0.038    |
| <b>PDHA</b>   | 5.84 (5.74, 5.95)    | 5.66 (5.55, 5.77)    | 0.019    | 0.086    | 3.20E-03 | 6.80E-05 | 1.90E-04 | 1.60E-04 |
| <b>PDHB</b>   |                      |                      | 0.951    | 0.951    | 0.09     | 0.033    | 0.062    | 0.024    |
| <b>PGD</b>    |                      |                      | 0.142    | 0.224    | 0.069    | 0.02     | 0.016    | 0.012    |
| <b>PGK1</b>   | 8.21 (8.05, 8.37)    | 8.01 (7.85, 8.17)    | 0.032    | 0.099    | 0.489    | 0.595    | 0.444    | 0.91     |
| <b>PGLS</b>   | 8.68 (8.54, 8.81)    | 8.90 (8.77, 9.03)    | 1.00E-02 | 0.063    | 0.14     | 0.056    | 0.079    | 0.119    |
| <b>PGLS</b>   | 8.68 (8.54, 8.81)    | 8.90 (8.77, 9.03)    | 1.00E-02 | 0.063    | 0.195    | 0.013    | 0.079    | 0.034    |
| <b>PGM1</b>   |                      |                      | 0.094    | 0.160    | 0.085    | 0.097    | 0.162    | 0.039    |
| <b>PKM2</b>   |                      |                      | 0.445    | 0.519    | 0.088    | 0.026    | 0.042    | 0.042    |
| <b>RBKS</b>   | 6.89 (6.78, 7.00)    | 7.06 (6.94, 7.17)    | 0.037    | 0.106    | 0.717    | 0.625    | 0.752    | 0.347    |
| <b>RPE</b>    |                      |                      | 0.194    | 0.284    | 0.013    | 0.037    | 0.023    | 4.20E-03 |
| <b>RPIA</b>   |                      |                      | 0.08     | 0.158    | 0.678    | 0.518    | 0.692    | 0.314    |
| <b>SAT1</b>   | 12.38 (12.18, 12.58) | 12.66 (12.46, 12.85) | 0.033    | 0.099    | 0.761    | 0.133    | 0.418    | 0.252    |
| <b>SDHA</b>   |                      |                      | 0.061    | 0.147    | 0.496    | 0.48     | 0.921    | 0.452    |
| <b>SDHB</b>   |                      |                      | 0.414    | 0.511    | 0.036    | 0.026    | 0.018    | 0.082    |
| <b>SDHC</b>   | 6.29 (6.15, 6.44)    | 6.06 (5.91, 6.21)    | 0.028    | 0.098    | 0.21     | 0.025    | 0.055    | 0.021    |
| <b>SDHD</b>   |                      |                      | 0.295    | 0.395    | 0.756    | 0.426    | 0.468    | 0.372    |
| <b>SHMT1</b>  | 6.98 (6.76, 7.21)    | 7.32 (7.10, 7.55)    | 0.023    | 0.089    | 0.142    | 0.083    | 0.106    | 0.164    |
| <b>SMOX</b>   | 6.87 (6.47, 7.27)    | 7.45 (7.06, 7.84)    | 9.50E-03 | 0.063    | 0.167    | 0.095    | 0.104    | 0.079    |
| <b>SMS</b>    |                      |                      | 0.078    | 0.158    | 3.00E-03 | 8.40E-03 | 9.00E-03 | 2.40E-03 |
| <b>SRM</b>    |                      |                      | 0.166    | 0.255    | 0.918    | 0.946    | 0.996    | 0.718    |
| <b>SUCLG</b>  | 8.90 (8.77, 9.03)    | 9.11 (8.98, 9.24)    | 0.016    | 0.082    | 0.785    | 0.324    | 0.309    | 0.519    |
| <b>TALDO1</b> |                      |                      | 0.801    | 0.831    | 6.80E-03 | 0.017    | 8.80E-03 | 5.90E-03 |
| <b>TKT</b>    |                      |                      | 0.086    | 0.158    | 0.149    | 0.083    | 0.117    | 0.059    |
| <b>TPI1</b>   | 9.68 (9.43, 9.92)    | 9.33 (9.08, 9.57)    | 0.03     | 0.099    | 0.094    | 0.114    | 0.118    | 0.064    |

ACACA: Acetyl-CoA carboxylase alpha, ACO1: Aconitase 1, ACO2: Aconitase 2, ACSL1: Acyl-CoA synthetase 1, ACSL3: Acyl-CoA synthetase 3, ACSL4: Acyl-CoA synthetase 4, ACSL5: Acyl-CoA synthetase 5, ACSL6: Acyl-CoA synthetase 6, AGXT1: Alanine-glyoxylate aminotransferase 1, ALDOA: Aldolase A, ALDOB: Aldolase B, ALDOC: Aldolase C, AMD1: Adenosylmethionine decarboxylase, CHKA: Choline kinase alpha, CS: Citrate synthase, DLD: Dihydrolipoamide dehydrogenase, DLST: Dihydrolipoamides-succinyltransferase, ENO1: Enolase 1, FASN: Fatty acid synthase, FH: Fumarate hydratase, G6PD: Glucose-6-phosphate dehydrogenase, GAPDH: Glyceraldehyde-3-phosphatedehydrogenase, GPI: Glucose-6-phosphate isomerase, HK1: Hexokinase 1, HK2: Hexokinase 2, IDH1: Isocitrate dehydrogenase 1, IDH2: Isocitrate dehydrogenase 2, IDH3A: Isocitrate dehydrogenase 3A, IDH3B: Isocitrate dehydrogenase 3B, IDH3G: Isocitrate dehydrogenase 3G, MDH1: Malate dehydrogenase 1, MDH2: Malate dehydrogenase 2, NPY: Neuropeptide Y, OAZ: Ornithine decarboxylase antizyme, ODC: Ornithine decarboxylase, OGDH: Oxoglutarate (alpha-ketoglutarate) dehydrogenase, OGDHL: Oxoglutarate dehydrogenase-like, PDHA: Pyruvate dehydrogenase alpha, PDHB: Pyruvate dehydrogenase beta, PGK1: Phosphoglycerate kinase, PGD: Phosphogluconate dehydrogenase, PGLS: 6-phosphogluconolactonase, PGM1: Phosphoglucomutase, PKM2: Pyruvate kinase, RBKS: Ribokinase, RPE: Ribulose-5-phosphate-3-epimerase, RPIA: Ribose 5-phosphate isomerase, SAT1: Spermidine/spermine-N1-acetyltransferase 1, SDHA: Succinate dehydrogenase complex, subunit A, SDHB: Succinate dehydrogenase complex, subunit B, SDHD: Succinate dehydrogenase complex, subunit D, SHMT1: Serine hydroxymethyltransferase 1, SMOX: Spermine oxidase, SMS: Spermine synthase, SRM: Spermidine synthase, SUCLG: Succinyl-CoA ligase, TALDO1: Transaldolase 1, TKT: Transketolase, TPI1: Triosephosphate isomerase 1. Since the gene expression values were log2 transformed, a difference in expression by one unit corresponds to a twofold mean change in probe intensities. \*Benjamini-Hochberg corrected.

**Supplementary Table S8: Differences in levels of quantified metabolites in the main cohort comparing ERG<sub>high</sub> samples to ERG<sub>low</sub> samples in low Gleason samples (Gleason ≤ 3 + 4), corrected for multiple testing with Benjamini-Hochberg correction and adjusted for stroma, cancer, benign epithelia and luminal space**

| Metabolites         | ERG <sub>low</sub>                                | ERG <sub>high</sub>                               | <i>p</i> -value | <i>p</i> -value* | Adjusted for stromal content | Adjusted for cancer content | Adjusted for benign epithelial content | Adjusted for luminal space content |
|---------------------|---------------------------------------------------|---------------------------------------------------|-----------------|------------------|------------------------------|-----------------------------|----------------------------------------|------------------------------------|
|                     | ( <i>n</i> = 12)                                  | ( <i>n</i> = 17)                                  |                 |                  |                              |                             |                                        |                                    |
|                     | Concentrations mmoles/kg wet weight, median (IQR) | Concentrations mmoles/kg wet weight, median (IQR) |                 |                  |                              |                             |                                        |                                    |
| Alanine             | 1.99 (1.64 to 2.43)                               | 2.60 (1.78 to 2.85)                               | 0.651           | 0.83             | 0.766                        | 0.702                       | 0.622                                  | 0.667                              |
| Choline             | 0.78 (0.49 to 1.43)                               | 1.23 (0.84 to 1.48)                               | 0.087           | 0.16             | 0.364                        | 0.143                       | 0.075                                  | 0.082                              |
| Citrate             | 13.95 (8.62 to 17.06)                             | 7.07 (3.43 to 7.82)                               | 0.001           | 0.004            | 7.70E-05                     | 1.10E-03                    | 9.90E-04                               | 8.00E-04                           |
| Creatine            | 2.23 (1.63 to 2.58)                               | 2.23 (1.68 to 2.67)                               | 0.679           | 0.83             | 0.708                        | 0.634                       | 0.663                                  | 0.742                              |
| Ethm                | 0.00 (0.00 to 0.00)                               | 0.02 (0.00 to 0.41)                               | 0.06            | 0.132            | 0.176                        | 0.117                       | 0.058                                  | 0.052                              |
| Glucose             | 0.23 (0.00 to 0.43)                               | 0.00 (0.00 to 0.07)                               | 0.12            | 0.203            | 0.222                        | 0.203                       | 0.126                                  | 0.095                              |
| Glutamate           | 4.58 (3.77 to 5.48)                               | 4.55 (4.20 to 7.79)                               | 0.068           | 0.136            | 0.161                        | 0.259                       | 0.087                                  | 0.065                              |
| Glutamine           | 2.35 (2.05 to 2.68)                               | 3.18 (2.27 to 3.66)                               | 0.005           | 0.018            | 0.012                        | 8.40E-03                    | 5.20E-03                               | 5.80E-03                           |
| Glycine             | 1.71 (1.43 to 2.22)                               | 2.68 (1.93 to 3.51)                               | < 0.001         | 0.002            | 8.00E-04                     | 4.60E-04                    | 1.70E-04                               | 2.90E-04                           |
| GPC                 | 0.67 (0.48 to 1.18)                               | 0.98 (0.68 to 1.24)                               | 0.908           | 0.951            | 0.762                        | 0.855                       | 0.755                                  | 0.783                              |
| GPE                 | 0.33 (0 to 0.53)                                  | 0.00 (0.00 to 0.73)                               | < 0.001         | < 0.001          | 1.30E-40                     | 4.10E-10                    | 1.30E-03                               | 6.00E-32                           |
| Isoleucine          | 0.16 (0.00 to 0.18)                               | 0.16 (0.11 to 0.28)                               | 0.027           | 0.085            | 5.50E-04                     | 0.015                       | 0.029                                  | 0.016                              |
| Lactate             | 19.77 (16.68 to 22.66)                            | 17.81 (15.69 to 22.01)                            | 0.997           | 0.997            | 0.845                        | 0.833                       | 0.984                                  | 0.984                              |
| Leucine             | 0.33 (0.26 to 0.45)                               | 0.44 (0.28 to 0.63)                               | 0.364           | 0.501            | 0.447                        | 0.329                       | 0.353                                  | 0.37                               |
| Myo-<br>inositol    | 9.94 (7.71 to 10.25)                              | 8.79 (7.23 to 10.09)                              | 0.795           | 0.875            | 0.702                        | 0.744                       | 0.796                                  | 0.78                               |
| PCh                 | 0.43 (0.26 to 0.81)                               | 0.90 (0.54 to 1.17)                               | 0.039           | 0.107            | 0.014                        | 0.033                       | 0.032                                  | 0.043                              |
| PE                  | 2.18 (1.49 to 2.54)                               | 2.63 (2.26 to 3.71)                               | 0.055           | 0.132            | 0.016                        | 0.053                       | 0.039                                  | 0.034                              |
| Putrescine          | 0.20 (0.00 to 0.83)                               | 0.05 (0.00 to 0.16)                               | 0.001           | 0.004            | 4.60E-03                     | 0.075                       | 0.029                                  | 1.00E-03                           |
| Scyllo-<br>inositol | 0.40 (0.27 to 0.87)                               | 0.41 (0.32 to 0.61)                               | 0.742           | 0.859            | 0.286                        | 0.257                       | 0.783                                  | 0.738                              |
| Spermine            | 3.56 (1.64 to 6.07)                               | 1.18 (0.69 to 1.54)                               | < 0.001         | < 0.001          | 9.10E-08                     | 2.00E-05                    | 4.50E-05                               | 5.60E-06                           |
| Succinate           | 0.51 (0.39 to 0.73)                               | 0.62 (0.52 to 0.94)                               | 0.151           | 0.237            | 0.325                        | 0.191                       | 0.142                                  | 0.133                              |
| Taurine             | 4.83 (3.20 to 6.05)                               | 4.23 (3.03 to 4.73)                               | 0.344           | 0.501            | 0.488                        | 0.46                        | 0.333                                  | 0.519                              |
| Valine              | 1.99 (1.64 to 2.43)                               | 2.60 (1.78 to 2.85)                               | 0.651           | 0.83             | 0.026                        | 0.021                       | 0.013                                  | 8.40E-03                           |

Ethm: Ethanamine, GPC: Glycerophosphocholine, GPE: Glycerophosphoethanolamine, PCh: Phosphocholine, PE: Phosphoethanolamine \*Benjamini-Hochberg corrected.

**Supplementary Table S9: Differences in levels of quantified metabolites in the main cohort comparing ERG<sub>high</sub> samples to ERG<sub>low</sub> samples in high Gleason samples (Gleason  $\geq 4 + 3$ ), corrected for multiple testing with Benjamini-Hochberg correction and adjusted for stroma, cancer, benign epithelia and luminal space**

| Metabolites         | ERG <sub>low</sub>                                | ERG <sub>high</sub>                               | <i>p</i> -value | <i>p</i> value* | Adjusted for stromal content | Adjusted for cancer content | Adjusted for benign epithelial content | Adjusted for luminal space content |
|---------------------|---------------------------------------------------|---------------------------------------------------|-----------------|-----------------|------------------------------|-----------------------------|----------------------------------------|------------------------------------|
|                     | ( <i>n</i> = 18)                                  | ( <i>n</i> = 17)                                  |                 |                 |                              |                             |                                        |                                    |
|                     | Concentrations mmoles/kg wet weight, median (IQR) | Concentrations mmoles/kg wet weight, median (IQR) |                 |                 |                              |                             |                                        |                                    |
| Alanine             | 2.34 (1.83 to 3.34)                               | 2.36 (1.97 to 2.78)                               | 0.762           | 0.922           | 0.723                        | 0.51                        | 0.453                                  | 0.785                              |
| Choline             | 1.01 (0.66 to 1.43)                               | 1.23 (0.90 to 1.66)                               | 0.372           | 0.611           | 0.381                        | 0.508                       | 0.454                                  | 0.322                              |
| Citrate             | 7.58 (5.51 to 10.69)                              | 2.95 (2.34 to 4.04)                               | < 0.001         | 0.003           | 1.60E-04                     | 1.00E-04                    | 1.30E-04                               | 3.20E-04                           |
| Creatine            | 2.27 (1.71 to 2.75)                               | 1.97 (1.60 to 2.22)                               | 0.825           | 0.928           | 0.841                        | 0.761                       | 0.865                                  | 0.848                              |
| Ethm                | 0.00 (0.00 to 0.08)                               | 0.00 (0.00 to 0.19)                               | 0.6             | 0.812           | 0.619                        | 0.79                        | 0.969                                  | 0.676                              |
| Glucose             | 0.15 (0.00 to 1.00)                               | 0.00 (0.00 to 0.04)                               | 0.016           | 0.087           | 6.10E-03                     | 0.068                       | 0.313                                  | 0.017                              |
| Glutamate           | 4.67 (4.11 to 7.28)                               | 6.31 (5.75 to 7.74)                               | 0.241           | 0.504           | 0.294                        | 0.54                        | 0.517                                  | 0.215                              |
| Glutamine           | 2.80 (2.45 to 3.89)                               | 2.93 (2.69 to 3.70)                               | 0.907           | 0.948           | 0.812                        | 0.461                       | 0.361                                  | 0.946                              |
| Glycine             | 2.57 (1.85 to 3.08)                               | 3.17 (2.11 to 3.65)                               | 0.366           | 0.611           | 0.389                        | 0.58                        | 0.833                                  | 0.417                              |
| GPC                 | 0.81 (0.54 to 1.43)                               | 0.84 (0.44 to 1.08)                               | 0.714           | 0.912           | 0.798                        | 0.886                       | 0.908                                  | 0.38                               |
| GPE                 | 0.00 (0.00 to 0.55)                               | 0.00 (0.00 to 0.36)                               | 0.541           | 0.778           | 0.538                        | 0.518                       | 0.507                                  | 0.413                              |
| Isoleucine          | 0.18 (0.07 to 0.27)                               | 0.24 (0.12 to 0.32)                               | 0.188           | 0.48            | 0.183                        | 0.133                       | 5.50E-03                               | 0.208                              |
| Lactate             | 22.02 (15.64 to 27.75)                            | 16.45 (15.70 to 20.85)                            | 0.065           | 0.249           | 0.064                        | 0.046                       | 0.056                                  | 0.04                               |
| Leucine             | 0.52 (0.34 to 0.65)                               | 0.59 (0.45 to 0.83)                               | 0.974           | 0.974           | 0.978                        | 0.86                        | 0.828                                  | 0.966                              |
| Myo-<br>inositol    | 10.82 (6.72 to 12.76)                             | 9.39 (7.43 to 11.35)                              | 0.226           | 0.504           | 0.236                        | 0.226                       | 0.401                                  | 0.377                              |
| PCh                 | 0.72 (0.45 to 1.03)                               | 1.12 (0.74 to 1.36)                               | 0.019           | 0.087           | 0.021                        | 0.079                       | 0.232                                  | 0.011                              |
| PE                  | 2.62 (1.35 to 3.69)                               | 2.95 (2.78 to 3.80)                               | 0.087           | 0.286           | 0.088                        | 0.087                       | 0.081                                  | 0.03                               |
| Putrescine          | 0.11 (0.00 to 0.56)                               | 0.00 (0.00 to 0.00)                               | 0.008           | 0.058           | 7.70E-03                     | 6.80E-03                    | 0.096                                  | 0.01                               |
| Scyllo-<br>inositol | 0.38 (0.34 to 0.59)                               | 0.50 (0.41 to 0.60)                               | 0.366           | 0.611           | 0.487                        | 0.295                       | 0.191                                  | 0.604                              |
| Spermine            | 1.65 (1.15 to 2.27)                               | 0.58 (0.39 to 1.02)                               | < 0.001         | 0.004           | 3.10E-04                     | 4.30E-04                    | 3.10E-03                               | 4.90E-04                           |
| Succinate           | 0.60 (0.54 to 0.74)                               | 0.63 (0.46 to 0.76)                               | 0.847           | 0.928           | 0.824                        | 0.516                       | 0.637                                  | 0.963                              |
| Taurine             | 6.21 (4.05 to 7.15)                               | 4.30 (3.70 to 6.49)                               | 0.172           | 0.48            | 0.176                        | 0.314                       | 0.581                                  | 0.222                              |
| Valine              | 0.46 (0.28 to 0.58)                               | 0.40 (0.28 to 0.52)                               | 0.441           | 0.676           | 0.38                         | 0.272                       | 0.463                                  | 0.363                              |

Ethm: Ethanolamine, GPC: Glycerophosphocholine, GPE: Glycerophosphoethanolamine, PCh: Phosphocholine, PE: Phosphoethanolamine \*Benjamini-Hochberg corrected.

**Supplementary Table S10: INMEX-analysis of KEGG-pathways in the main cohort**

| Pathway                                                    | Total | Expected | Hits | P-Value  | Topology |
|------------------------------------------------------------|-------|----------|------|----------|----------|
| Glutathione metabolism                                     | 75    | 6.5205   | 17   | 0.000155 | 0.79245  |
| Purine metabolism                                          | 234   | 20.344   | 33   | 0.00267  | 0.66667  |
| Glycerolipid metabolism                                    | 72    | 6.2597   | 14   | 0.002904 | 0.78378  |
| Arginine and proline metabolism                            | 102   | 8.8679   | 17   | 0.005846 | 0.63441  |
| Cyanoamino acid metabolism                                 | 12    | 1.0433   | 4    | 0.015752 | 1.25     |
| Pyruvate metabolism                                        | 64    | 5.5642   | 11   | 0.019979 | 0.78261  |
| Glycolysis / Gluconeogenesis                               | 91    | 7.9116   | 14   | 0.023299 | 0.57627  |
| Glycosaminoglycan degradation                              | 20    | 1.7388   | 5    | 0.024915 | 0.42105  |
| Glycine, serine and threonine metabolism                   | 68    | 5.9119   | 11   | 0.030255 | 0.66667  |
| Pentose and glucuronate interconversions                   | 52    | 4.5209   | 9    | 0.032529 | 0.89655  |
| Lysine degradation                                         | 73    | 6.3466   | 11   | 0.04783  | 0.46512  |
| beta-Alanine metabolism                                    | 50    | 4.347    | 8    | 0.063613 | 0.38095  |
| Propanoate metabolism                                      | 52    | 4.5209   | 8    | 0.076871 | 0.63415  |
| Glyoxylate and dicarboxylate metabolism                    | 53    | 4.6078   | 8    | 0.084079 | 0.52     |
| Valine, leucine and isoleucine degradation                 | 82    | 7.1291   | 11   | 0.094732 | 0.43333  |
| Pentose phosphate pathway                                  | 48    | 4.1731   | 7    | 0.11797  | 0.97561  |
| Vitamin B6 metabolism                                      | 15    | 1.3041   | 3    | 0.13563  | 0.4      |
| Ether lipid metabolism                                     | 51    | 4.4339   | 7    | 0.14941  | 0.34483  |
| Fatty acid metabolism                                      | 83    | 7.216    | 10   | 0.17989  | 1.2621   |
| Ascorbate and aldarate metabolism                          | 35    | 3.0429   | 5    | 0.18309  | 0.83333  |
| Alanine, aspartate and glutamate metabolism                | 56    | 4.8686   | 7    | 0.20941  | 0.40816  |
| Aminoacyl-tRNA biosynthesis                                | 87    | 7.5638   | 10   | 0.2201   | 0.27536  |
| One carbon pool by folate                                  | 28    | 2.4343   | 4    | 0.22201  | 0.26667  |
| Sphingolipid metabolism                                    | 67    | 5.825    | 8    | 0.22271  | 0.35849  |
| Nicotinate and nicotinamide metabolism                     | 39    | 3.3907   | 5    | 0.24769  | 0.43243  |
| Pyrimidine metabolism                                      | 142   | 12.346   | 15   | 0.24795  | 0.49558  |
| Arachidonic acid metabolism                                | 100   | 8.694    | 11   | 0.24825  | 0.41026  |
| Riboflavin metabolism                                      | 20    | 1.7388   | 3    | 0.24925  | 0.46154  |
| Mucin type O-Glycan biosynthesis                           | 32    | 2.7821   | 4    | 0.30123  | 0.15     |
| Histidine metabolism                                       | 44    | 3.8254   | 5    | 0.33492  | 0.1875   |
| Glycerophospholipid metabolism                             | 119   | 10.346   | 12   | 0.33741  | 0.37333  |
| Glycosphingolipid biosynthesis – ganglio series            | 14    | 1.2172   | 2    | 0.34713  | 0.26087  |
| Glycosaminoglycan biosynthesis – chondroitin sulfate       | 14    | 1.2172   | 2    | 0.34713  | 0.42857  |
| Pantothenate and CoA biosynthesis                          | 35    | 3.0429   | 4    | 0.3626   | 0.58065  |
| Glycosaminoglycan biosynthesis – heparan sulfate           | 5     | 0.4347   | 1    | 0.36563  | 0.33333  |
| Butanoate metabolism                                       | 47    | 4.0862   | 5    | 0.38864  | 0.5625   |
| Tryptophan metabolism                                      | 80    | 6.9552   | 8    | 0.39387  | 0.325    |
| Glycosphingolipid biosynthesis – lacto and neolacto series | 26    | 2.2604   | 3    | 0.39675  | 0.067797 |
| Porphyrin and chlorophyll metabolism                       | 70    | 6.0858   | 7    | 0.408    | 0.29787  |
| Metabolism of xenobiotics by cytochrome P450               | 139   | 12.085   | 13   | 0.43406  | 0.4      |
| Retinol metabolism                                         | 83    | 7.216    | 8    | 0.43514  | 0.51163  |
| N-Glycan biosynthesis                                      | 50    | 4.347    | 5    | 0.44211  | 0.17143  |
| Citrate cycle (TCA cycle)                                  | 50    | 4.347    | 5    | 0.44211  | 0.75     |
| Butirosin and neomycin biosynthesis                        | 7     | 0.60858  | 1    | 0.47135  | 0.66667  |
| Taurine and hypotaurine metabolism                         | 18    | 1.5649   | 2    | 0.47262  | 0.4      |

|                                                              |     |         |    |         |          |
|--------------------------------------------------------------|-----|---------|----|---------|----------|
| <b>Sulfur metabolism</b>                                     | 19  | 1.6519  | 2  | 0.50172 | 0.5      |
| <b>Drug metabolism – other enzymes</b>                       | 77  | 6.6944  | 7  | 0.51018 | 0.31579  |
| <b>Starch and sucrose metabolism</b>                         | 78  | 6.7813  | 7  | 0.52435 | 0.35185  |
| <b>Galactose metabolism</b>                                  | 55  | 4.7817  | 5  | 0.52831 | 0.36735  |
| <b>Fructose and mannose metabolism</b>                       | 55  | 4.7817  | 5  | 0.52831 | 0.43243  |
| <b>Inositol phosphate metabolism</b>                         | 90  | 7.8246  | 8  | 0.52956 | 0.375    |
| <b>Drug metabolism – cytochrome P450</b>                     | 127 | 11.041  | 11 | 0.55364 | 0.14815  |
| <b>Fatty acid elongation</b>                                 | 57  | 4.9556  | 5  | 0.56115 | 0.35616  |
| <b>Amino sugar and nucleotide sugar metabolism</b>           | 84  | 7.303   | 7  | 0.60576 | 0.2716   |
| <b>Thiamine metabolism</b>                                   | 11  | 0.95634 | 1  | 0.63303 | 0.36364  |
| <b>Valine, leucine and isoleucine biosynthesis</b>           | 13  | 1.1302  | 1  | 0.69432 | 0.72727  |
| <b>Synthesis and degradation of ketone bodies</b>            | 14  | 1.2172  | 1  | 0.72102 | 0.44444  |
| <b>Phenylalanine metabolism</b>                              | 29  | 2.5213  | 2  | 0.7326  | 0.36364  |
| <b>Caffeine metabolism</b>                                   | 17  | 1.478   | 1  | 0.78799 | 0.11765  |
| <b>Selenocompound metabolism</b>                             | 33  | 2.869   | 2  | 0.79592 | 0.21429  |
| <b>Primary bile acid biosynthesis</b>                        | 63  | 5.4772  | 4  | 0.8118  | 0.34043  |
| <b>Glycosylphosphatidylinositol(GPI)–anchor biosynthesis</b> | 20  | 1.7388  | 1  | 0.83893 | 0.096774 |
| <b>Tyrosine metabolism</b>                                   | 80  | 6.9552  | 5  | 0.83931 | 0.27586  |
| <b>Biosynthesis of unsaturated fatty acids</b>               | 27  | 2.3474  | 1  | 0.91528 | 0.6875   |
| <b>Folate biosynthesis</b>                                   | 32  | 2.7821  | 1  | 0.94652 | 0.11429  |
| <b>alpha–Linolenic acid metabolism</b>                       | 34  | 2.956   | 1  | 0.95552 | 0.1      |
| <b>Linoleic acid metabolism</b>                              | 34  | 2.956   | 1  | 0.95552 | 0.25     |
| <b>Terpenoid backbone biosynthesis</b>                       | 39  | 3.3907  | 1  | 0.97196 | 0.057143 |
| <b>Cysteine and methionine metabolism</b>                    | 63  | 5.4772  | 2  | 0.97836 | 0.072727 |
| <b>Fatty acid biosynthesis</b>                               | 49  | 4.2601  | 1  | 0.98888 | 0.11111  |
| <b>Steroid biosynthesis</b>                                  | 54  | 4.6948  | 1  | 0.99301 | 0.029412 |
| <b>Steroid hormone biosynthesis</b>                          | 137 | 11.911  | 4  | 0.99854 | 0.17978  |



**Supplementary Table S11: INMEX-analysis of KEGG-pathways in the main cohort in low Gleason (Gleason  $\leq 3 + 4$ ) samples**

| Pathway                                                    | Total | Expected | Hits | P.Value  | Topology |
|------------------------------------------------------------|-------|----------|------|----------|----------|
| Purine metabolism                                          | 234   | 15.941   | 34   | 8.98E-06 | 0.57471  |
| Glutathione metabolism                                     | 75    | 5.1091   | 14   | 0.000393 | 0.75472  |
| Pyrimidine metabolism                                      | 142   | 9.6733   | 18   | 0.006584 | 0.58407  |
| Glycolysis / Gluconeogenesis                               | 91    | 6.1991   | 13   | 0.007606 | 0.57627  |
| Glycosaminoglycan degradation                              | 20    | 1.3624   | 5    | 0.009281 | 0.42105  |
| Valine, leucine and isoleucine degradation                 | 82    | 5.586    | 11   | 0.021342 | 0.45556  |
| Lysine degradation                                         | 73    | 4.9729   | 10   | 0.024199 | 0.46512  |
| Arginine and proline metabolism                            | 102   | 6.9484   | 12   | 0.041654 | 0.31183  |
| Tryptophan metabolism                                      | 80    | 5.4498   | 10   | 0.042465 | 0.375    |
| Cyanoamino acid metabolism                                 | 12    | 0.81746  | 3    | 0.043309 | 1.25     |
| Nicotinate and nicotinamide metabolism                     | 39    | 2.6568   | 6    | 0.045681 | 0.48649  |
| beta-Alanine metabolism                                    | 50    | 3.4061   | 7    | 0.050052 | 0.33333  |
| Glycerolipid metabolism                                    | 72    | 4.9048   | 9    | 0.052883 | 0.2973   |
| Pentose and glucuronate interconversions                   | 52    | 3.5423   | 7    | 0.05985  | 0.48276  |
| Vitamin B6 metabolism                                      | 15    | 1.0218   | 3    | 0.077143 | 0.4      |
| Sphingolipid metabolism                                    | 67    | 4.5642   | 8    | 0.081965 | 0.32075  |
| Ascorbate and aldarate metabolism                          | 35    | 2.3843   | 5    | 0.08539  | 0.83333  |
| Pentose phosphate pathway                                  | 48    | 3.2699   | 6    | 0.10428  | 0.87805  |
| Fatty acid metabolism                                      | 83    | 5.6541   | 9    | 0.10817  | 1.1456   |
| Citrate cycle (TCA cycle)                                  | 50    | 3.4061   | 6    | 0.12099  | 0.75     |
| Ether lipid metabolism                                     | 51    | 3.4742   | 6    | 0.12981  | 0.2069   |
| Propanoate metabolism                                      | 52    | 3.5423   | 6    | 0.13894  | 0.58537  |
| Glyoxylate and dicarboxylate metabolism                    | 53    | 3.6105   | 6    | 0.14836  | 0.48     |
| Drug metabolism – cytochrome P450                          | 127   | 8.6515   | 12   | 0.15174  | 0.16667  |
| Glycine, serine and threonine metabolism                   | 68    | 4.6323   | 7    | 0.17714  | 0.53968  |
| Amino sugar and nucleotide sugar metabolism                | 84    | 5.7222   | 8    | 0.20982  | 0.39506  |
| Pantothenate and CoA biosynthesis                          | 35    | 2.3843   | 4    | 0.21232  | 0.58065  |
| Aminoacyl-tRNA biosynthesis                                | 87    | 5.9266   | 8    | 0.23802  | 0.21739  |
| Pyruvate metabolism                                        | 64    | 4.3598   | 6    | 0.26789  | 0.34783  |
| Retinol metabolism                                         | 83    | 5.6541   | 7    | 0.33519  | 0.37209  |
| Metabolism of xenobiotics by cytochrome P450               | 139   | 9.4689   | 11   | 0.34633  | 0.36364  |
| Fatty acid elongation                                      | 57    | 3.883    | 5    | 0.34699  | 0.35616  |
| Histidine metabolism                                       | 44    | 2.9974   | 4    | 0.35192  | 0.125    |
| Riboflavin metabolism                                      | 20    | 1.3624   | 2    | 0.39995  | 0.30769  |
| Starch and sucrose metabolism                              | 78    | 5.3135   | 6    | 0.44142  | 0.33333  |
| Arachidonic acid metabolism                                | 100   | 6.8122   | 7    | 0.5286   | 0.4359   |
| Glycosphingolipid biosynthesis – lacto and neolacto series | 26    | 1.7712   | 2    | 0.53782  | 0.050847 |
| Thiamine metabolism                                        | 11    | 0.74934  | 1    | 0.54049  | 0.36364  |
| Biosynthesis of unsaturated fatty acids                    | 27    | 1.8393   | 2    | 0.55861  | 0.6875   |
| One carbon pool by folate                                  | 28    | 1.9074   | 2    | 0.57873  | 0.2      |
| Inositol phosphate metabolism                              | 90    | 6.131    | 6    | 0.5844   | 0.25     |
| Glycosphingolipid biosynthesis – globo series              | 13    | 0.88559  | 1    | 0.60122  | 0.22222  |
| Valine, leucine and isoleucine biosynthesis                | 13    | 0.88559  | 1    | 0.60122  | 0.72727  |
| Drug metabolism – other enzymes                            | 77    | 5.2454   | 5    | 0.61177  | 0.17544  |



|                                                              |     |         |   |         |          |
|--------------------------------------------------------------|-----|---------|---|---------|----------|
| <b>Glycosaminoglycan biosynthesis – chondroitin sulfate</b>  | 14  | 0.95371 | 1 | 0.62852 | 0.28571  |
| <b>Synthesis and degradation of ketone bodies</b>            | 14  | 0.95371 | 1 | 0.62852 | 0.44444  |
| <b>Tyrosine metabolism</b>                                   | 80  | 5.4498  | 5 | 0.64615 | 0.22989  |
| <b>N–Glycan biosynthesis</b>                                 | 50  | 3.4061  | 3 | 0.6735  | 0.11429  |
| <b>Caffeine metabolism</b>                                   | 17  | 1.1581  | 1 | 0.69976 | 0.11765  |
| <b>Glycerophospholipid metabolism</b>                        | 119 | 8.1065  | 7 | 0.71401 | 0.17333  |
| <b>Taurine and hypotaurine metabolism</b>                    | 18  | 1.2262  | 1 | 0.72034 | 0.13333  |
| <b>Galactose metabolism</b>                                  | 55  | 3.7467  | 3 | 0.73553 | 0.22449  |
| <b>Fructose and mannose metabolism</b>                       | 55  | 3.7467  | 3 | 0.73553 | 0.27027  |
| <b>Glycosylphosphatidylinositol(GPI)–anchor biosynthesis</b> | 20  | 1.3624  | 1 | 0.75739 | 0.096774 |
| <b>Primary bile acid biosynthesis</b>                        | 63  | 4.2917  | 3 | 0.81507 | 0.25532  |
| <b>Butanoate metabolism</b>                                  | 47  | 3.2017  | 2 | 0.84148 | 0.375    |
| <b>Porphyrin and chlorophyll metabolism</b>                  | 70  | 4.7685  | 3 | 0.86718 | 0.10638  |
| <b>Phenylalanine metabolism</b>                              | 29  | 1.9755  | 1 | 0.8722  | 0.18182  |
| <b>Mucin type O–Glycan biosynthesis</b>                      | 32  | 2.1799  | 1 | 0.89684 | 0.15     |
| <b>Alanine, aspartate and glutamate metabolism</b>           | 56  | 3.8148  | 2 | 0.90443 | 0.12245  |
| <b>Linoleic acid metabolism</b>                              | 34  | 2.3161  | 1 | 0.91058 | 0.5      |
| <b>Cysteine and methionine metabolism</b>                    | 63  | 4.2917  | 2 | 0.93638 | 0.10909  |
| <b>Steroid hormone biosynthesis</b>                          | 137 | 9.3327  | 2 | 0.99944 | 0.10112  |

**Supplementary Table S12: INMEX-analysis of KEGG-pathways in the main cohort in high Gleason (Gleason  $\geq 4 + 3$ ) samples**

| Pathway                                                    | Total | Expected | Hits | P-Value  | Topology |
|------------------------------------------------------------|-------|----------|------|----------|----------|
| Purine metabolism                                          | 234   | 5.4603   | 13   | 0.002268 | 0.41954  |
| Pyrimidine metabolism                                      | 142   | 3.3135   | 9    | 0.004933 | 0.49558  |
| Glutathione metabolism                                     | 75    | 1.7501   | 6    | 0.007251 | 0.49057  |
| Glycosphingolipid biosynthesis – lacto and neolacto series | 26    | 0.6067   | 3    | 0.02147  | 0.067797 |
| Nicotinate and nicotinamide metabolism                     | 39    | 0.91005  | 3    | 0.061006 | 0.37838  |
| Glycine, serine and threonine metabolism                   | 68    | 1.5868   | 4    | 0.072199 | 0.2381   |
| Arginine and proline metabolism                            | 102   | 2.3801   | 5    | 0.087048 | 0.16129  |
| Retinol metabolism                                         | 83    | 1.9368   | 4    | 0.1264   | 0.37209  |
| Arachidonic acid metabolism                                | 100   | 2.3335   | 4    | 0.20307  | 0.12821  |
| Cyanoamino acid metabolism                                 | 12    | 0.28002  | 1    | 0.24718  | 0.5      |
| Drug metabolism – other enzymes                            | 77    | 1.7968   | 3    | 0.26692  | 0.10526  |
| Glycosaminoglycan biosynthesis – chondroitin sulfate       | 14    | 0.32668  | 1    | 0.28207  | 0.14286  |
| Glycosphingolipid biosynthesis – ganglio series            | 14    | 0.32668  | 1    | 0.28207  | 0.17391  |
| Vitamin B6 metabolism                                      | 15    | 0.35002  | 1    | 0.29891  | 0.1      |
| Fatty acid metabolism                                      | 83    | 1.9368   | 3    | 0.3056   | 0.19417  |
| N–Glycan biosynthesis                                      | 50    | 1.1667   | 2    | 0.32651  | 0.057143 |
| Citrate cycle (TCA cycle)                                  | 50    | 1.1667   | 2    | 0.32651  | 0.29545  |
| Caffeine metabolism                                        | 17    | 0.39669  | 1    | 0.33143  | 0.11765  |
| Drug metabolism – cytochrome P450                          | 127   | 2.9635   | 4    | 0.3441   | 0.50926  |
| Taurine and hypotaurine metabolism                         | 18    | 0.42002  | 1    | 0.34713  | 0.13333  |
| Inositol phosphate metabolism                              | 90    | 2.1001   | 3    | 0.35105  | 0.125    |
| Glyoxylate and dicarboxylate metabolism                    | 53    | 1.2367   | 2    | 0.35238  | 0.12     |
| Fructose and mannose metabolism                            | 55    | 1.2834   | 2    | 0.36944  | 0.16216  |
| Riboflavin metabolism                                      | 20    | 0.46669  | 1    | 0.37746  | 0.15385  |
| Metabolism of xenobiotics by cytochrome P450               | 139   | 3.2435   | 4    | 0.40908  | 0.36364  |
| One carbon pool by folate                                  | 28    | 0.65337  | 1    | 0.48549  | 0.2      |
| Glycerolipid metabolism                                    | 72    | 1.6801   | 2    | 0.50592  | 0.18919  |
| Lysine degradation                                         | 73    | 1.7034   | 2    | 0.51337  | 0.13953  |
| Folate biosynthesis                                        | 32    | 0.74671  | 1    | 0.53236  | 0.11429  |
| Mucin type O–Glycan biosynthesis                           | 32    | 0.74671  | 1    | 0.53236  | 0.15     |
| Linoleic acid metabolism                                   | 34    | 0.79338  | 1    | 0.55419  | 0.5      |
| Tryptophan metabolism                                      | 80    | 1.8668   | 2    | 0.56346  | 0.05     |
| Tyrosine metabolism                                        | 80    | 1.8668   | 2    | 0.56346  | 0.068966 |
| Pantothenate and CoA biosynthesis                          | 35    | 0.81671  | 1    | 0.56473  | 0.12903  |
| Valine, leucine and isoleucine degradation                 | 82    | 1.9134   | 2    | 0.57709  | 0.044444 |
| beta–Alanine metabolism                                    | 50    | 1.1667   | 1    | 0.6963   | 0.047619 |
| Ether lipid metabolism                                     | 51    | 1.1901   | 1    | 0.70352  | 0.068966 |
| Pentose and glucuronate interconversions                   | 52    | 1.2134   | 1    | 0.71058  | 0.13793  |
| Alanine, aspartate and glutamate metabolism                | 56    | 1.3067   | 1    | 0.73718  | 0.081633 |
| Fatty acid elongation                                      | 57    | 1.3301   | 1    | 0.74344  | 0.041096 |
| Primary bile acid biosynthesis                             | 63    | 1.4701   | 1    | 0.77806  | 0.19149  |
| Sphingolipid metabolism                                    | 67    | 1.5634   | 1    | 0.79854  | 0.037736 |
| Porphyrin and chlorophyll metabolism                       | 70    | 1.6334   | 1    | 0.81267  | 0.042553 |
| Steroid hormone biosynthesis                               | 137   | 3.1968   | 2    | 0.83921  | 0.05618  |

|                                             |     |        |   |         |          |
|---------------------------------------------|-----|--------|---|---------|----------|
| Starch and sucrose metabolism               | 78  | 1.8201 | 1 | 0.84576 | 0.037037 |
| Amino sugar and nucleotide sugar metabolism | 84  | 1.9601 | 1 | 0.86673 | 0.049383 |
| Glycolysis / Gluconeogenesis                | 91  | 2.1234 | 1 | 0.88767 | 0.067797 |
| Glycerophospholipid metabolism              | 119 | 2.7768 | 1 | 0.94357 | 0.053333 |

**Supplementary Table S13: GSEA of KEGG-pathways in the main cohort, enrichment in ERG<sub>low</sub>**

| PATHWAY                                                  | SIZE | ES          | NES        | NOM p-val   | FDR q-val  |
|----------------------------------------------------------|------|-------------|------------|-------------|------------|
| DRUG METABOLISM CYTOCHROME P450                          | 55   | -0.6651254  | -1.7795105 | 0.002132196 | 0.38855085 |
| GLYCOLYSIS GLUCONEOGENESIS                               | 56   | -0.4682116  | -1.6126508 | 0.013100437 | 0.8536236  |
| HEMATOPOIETIC CELL LINEAGE                               | 68   | -0.6377796  | -1.5941937 | 0.01632653  | 0.66214764 |
| BETA ALANINE METABOLISM                                  | 19   | -0.6408701  | -1.563926  | 0.020242915 | 0.62843364 |
| GLUTATHIONE METABOLISM                                   | 45   | -0.5840763  | -1.5582185 | 0.052738335 | 0.528509   |
| PRION DISEASES                                           | 30   | -0.5652002  | -1.5239826 | 0.03285421  | 0.57103133 |
| HYPERTROPHIC CARDIOMYOPATHY HCM                          | 66   | -0.5525483  | -1.521536  | 0.04592902  | 0.49907997 |
| CARDIAC MUSCLE CONTRACTION                               | 58   | -0.5234164  | -1.5056521 | 0.033126295 | 0.4885571  |
| METABOLISM OF XENOBIOTICS BY CYTOCHROME P450             | 50   | -0.5358754  | -1.4941844 | 0.017094018 | 0.47057903 |
| VALINE LEUCINE AND ISOLEUCINE DEGRADATION                | 44   | -0.556476   | -1.491827  | 0.0741483   | 0.43163717 |
| PPAR SIGNALING PATHWAY                                   | 51   | -0.52109236 | -1.4773304 | 0.027139874 | 0.43209052 |
| FATTY ACID METABOLISM                                    | 35   | -0.4665317  | -1.4668512 | 0.07385229  | 0.42450482 |
| DILATED CARDIOMYOPATHY                                   | 73   | -0.51889294 | -1.4528376 | 0.07660455  | 0.4315167  |
| HISTIDINE METABOLISM                                     | 24   | -0.5824359  | -1.4319005 | 0.043912176 | 0.4642199  |
| APOPTOSIS                                                | 75   | -0.35446638 | -1.4161711 | 0.0503876   | 0.48000923 |
| TYROSINE METABOLISM                                      | 31   | -0.51137507 | -1.3706481 | 0.07236842  | 0.5867568  |
| RETINOL METABOLISM                                       | 40   | -0.4578147  | -1.3549248 | 0.06313646  | 0.6055808  |
| ARGININE AND PROLINE METABOLISM                          | 46   | -0.47907144 | -1.3485328 | 0.09325397  | 0.5914392  |
| PROXIMAL TUBULE BICARBONATE RECLAMATION                  | 18   | -0.5100017  | -1.3183355 | 0.11677282  | 0.6578999  |
| ALDOSTERONE REGULATED SODIUM REABSORPTION                | 33   | -0.5453702  | -1.3126537 | 0.1122449   | 0.64245903 |
| GLYCOSPHINGOLIPID BIOSYNTHESIS LACTO AND NEOLACTO SERIES | 17   | -0.47345862 | -1.2855277 | 0.15303983  | 0.6999029  |
| PROPANOATE METABOLISM                                    | 31   | -0.42541942 | -1.2627256 | 0.2413793   | 0.74142903 |
| MELANOGENESIS                                            | 82   | -0.38168576 | -1.2602468 | 0.12931034  | 0.71696585 |
| COLORECTAL CANCER                                        | 54   | -0.3426833  | -1.2553287 | 0.16260162  | 0.7035733  |
| NICOTINATE AND NICOTINAMIDE METABOLISM                   | 19   | -0.5683716  | -1.249494  | 0.15118791  | 0.69425493 |
| REGULATION OF ACTIN CYTOSKELETON                         | 176  | -0.32957068 | -1.2489338 | 0.18371607  | 0.6691262  |
| MTOR SIGNALING PATHWAY                                   | 43   | -0.32117867 | -1.2314632 | 0.15748031  | 0.7004713  |
| FOCAL ADHESION                                           | 168  | -0.38118944 | -1.2233069 | 0.20910972  | 0.70139503 |
| STEROID HORMONE BIOSYNTHESIS                             | 36   | -0.44694844 | -1.2228109 | 0.16115703  | 0.6786272  |
| B CELL RECEPTOR SIGNALING PATHWAY                        | 70   | -0.39102882 | -1.2056568 | 0.24158415  | 0.7087562  |
| GLIOMA                                                   | 57   | -0.33602458 | -1.2041162 | 0.16297787  | 0.6909752  |
| PANCREATIC CANCER                                        | 63   | -0.33796537 | -1.2031119 | 0.21850394  | 0.67281705 |
| PHENYLALANINE METABOLISM                                 | 17   | -0.50094825 | -1.1898077 | 0.21638656  | 0.6888747  |
| CELL ADHESION MOLECULES CAMS                             | 112  | -0.4456652  | -1.1702002 | 0.26814517  | 0.7239068  |

|                                                            |     |             |             |            |            |
|------------------------------------------------------------|-----|-------------|-------------|------------|------------|
| VASCULAR SMOOTH MUSCLE CONTRACTION                         | 89  | -0.3525924  | -1.1684161  | 0.2516269  | 0.70892125 |
| PHOSPHATIDYLINOSITOL SIGNALING SYSTEM                      | 65  | -0.32815862 | -1.1536041  | 0.26326963 | 0.73398    |
| NATURAL KILLER CELL MEDIATED CYTOTOXICITY                  | 101 | -0.3900806  | -1.1503791  | 0.3156823  | 0.72411835 |
| MAPK SIGNALING PATHWAY                                     | 218 | -0.2851731  | -1.1377566  | 0.22937626 | 0.74028134 |
| ADHERENS JUNCTION                                          | 62  | -0.31532508 | -1.1332755  | 0.2838983  | 0.7337195  |
| WNT SIGNALING PATHWAY                                      | 129 | -0.31501043 | -1.1323106  | 0.24347825 | 0.7179757  |
| ANTIGEN PROCESSING AND PRESENTATION                        | 65  | -0.43509716 | -1.1301155  | 0.33467743 | 0.7065309  |
| TRYPTOPHAN METABOLISM                                      | 33  | -0.43367508 | -1.1286054  | 0.27272728 | 0.6938948  |
| PYRUVATE METABOLISM                                        | 38  | -0.31179887 | -1.1273845  | 0.3224401  | 0.68096334 |
| CHEMOKINE SIGNALING PATHWAY                                | 152 | -0.3680516  | -1.1199098  | 0.31451613 | 0.683802   |
| ARRHYTHMOGENIC RIGHT VENTRICULAR CARDIOMYOPATHY ARVC       | 59  | -0.38263643 | -1.1110188  | 0.32415253 | 0.6903247  |
| PROSTATE CANCER                                            | 83  | -0.2898831  | -1.1048385  | 0.30181086 | 0.69068277 |
| P53 SIGNALING PATHWAY                                      | 61  | -0.36322063 | -1.1022831  | 0.31013918 | 0.6820439  |
| VIRAL MYOCARDITIS                                          | 62  | -0.4290487  | -1.102143   | 0.35918367 | 0.66820705 |
| CALCIUM SIGNALING PATHWAY                                  | 124 | -0.32479998 | -1.0972714  | 0.29817444 | 0.666126   |
| LEISHMANIA INFECTION                                       | 58  | -0.41226605 | -1.094746   | 0.3478261  | 0.6588297  |
| PYRIMIDINE METABOLISM                                      | 90  | -0.27208874 | -1.0883919  | 0.33539096 | 0.66017336 |
| ENDOCYTOSIS                                                | 156 | -0.25955555 | -1.080931   | 0.3253012  | 0.6651845  |
| FC EPSILON RI SIGNALING PATHWAY                            | 62  | -0.33219257 | -1.0740509  | 0.35458168 | 0.66915274 |
| INOSITOL PHOSPHATE METABOLISM                              | 49  | -0.29495132 | -1.0660963  | 0.36134455 | 0.6755806  |
| SNARE INTERACTIONS IN VESICULAR TRANSPORT                  | 34  | -0.33910057 | -1.059901   | 0.40361446 | 0.6771761  |
| LEUKOCYTE TRANSENDOTHELIAL MIGRATION                       | 94  | -0.3551334  | -1.0428008  | 0.3970894  | 0.70556414 |
| PARKINSONS DISEASE                                         | 103 | -0.23767659 | -1.0376086  | 0.39478958 | 0.70493156 |
| ASCORBATE AND ALDARATE METABOLISM                          | 18  | -0.4042498  | -1.0335944  | 0.41910332 | 0.7018473  |
| FC GAMMA R MEDIATED PHAGOCYTOSIS                           | 83  | -0.29817593 | -1.0322497  | 0.39959016 | 0.69348305 |
| TIGHT JUNCTION                                             | 106 | -0.27402833 | -1.0200877  | 0.41908714 | 0.7086325  |
| PATHWAYS IN CANCER                                         | 279 | -0.26002625 | -1.0173993  | 0.40248963 | 0.7030485  |
| HEDGEHOG SIGNALING PATHWAY                                 | 39  | -0.38406587 | -1.0157797  | 0.40900195 | 0.69598156 |
| OXIDATIVE PHOSPHORYLATION                                  | 107 | -0.22497028 | -1.0146433  | 0.42720306 | 0.68765503 |
| PORPHYRIN AND CHLOROPHYLL METABOLISM                       | 33  | -0.33246934 | -1.0108454  | 0.4486166  | 0.6846646  |
| NEUROTROPHIN SIGNALING PATHWAY                             | 114 | -0.224331   | -1.007843   | 0.4305835  | 0.6805984  |
| EPITHELIAL CELL SIGNALING IN HELICOBACTER PYLORI INFECTION | 65  | -0.25337642 | -0.9983357  | 0.4385246  | 0.69139266 |
| COMPLEMENT AND COAGULATION CASCADES                        | 52  | -0.4048311  | -0.9914725  | 0.46666667 | 0.69601685 |
| RENAL CELL CARCINOMA                                       | 61  | -0.27857324 | -0.98580015 | 0.47572815 | 0.69756716 |
| LINOLEIC ACID METABOLISM                                   | 16  | -0.4168835  | -0.97966015 | 0.47358122 | 0.7009005  |
| GRAFT VERSUS HOST DISEASE                                  | 31  | -0.47203773 | -0.97773933 | 0.47912526 | 0.6949405  |
| LONG TERM POTENTIATION                                     | 60  | -0.29623806 | -0.97161144 | 0.49275362 | 0.69866616 |
| MELANOMA                                                   | 58  | -0.26884857 | -0.9689658  | 0.52165353 | 0.6946373  |
| PRIMARY IMMUNODEFICIENCY                                   | 29  | -0.46399686 | -0.9642447  | 0.5423387  | 0.6954509  |
| ARACHIDONIC ACID METABOLISM                                | 40  | -0.3602123  | -0.94764656 | 0.5665962  | 0.72030175 |
| AXON GUIDANCE                                              | 119 | -0.26357418 | -0.9413953  | 0.55737704 | 0.723444   |
| HUNTINGTONS DISEASE                                        | 157 | -0.20142505 | -0.9413445  | 0.53816044 | 0.7140554  |
| CYTOKINE CYTOKINE RECEPTOR INTERACTION                     | 183 | -0.31934986 | -0.93090165 | 0.5535714  | 0.7261811  |

|                                                             |     |             |             |            |            |
|-------------------------------------------------------------|-----|-------------|-------------|------------|------------|
| <b>ALLOGRAFT REJECTION</b>                                  | 26  | -0.48169452 | -0.92606074 | 0.56363636 | 0.7267475  |
| <b>BASAL CELL CARCINOMA</b>                                 | 40  | -0.32223517 | -0.9183921  | 0.59163344 | 0.733288   |
| <b>NOD LIKE RECEPTOR SIGNALING PATHWAY</b>                  | 48  | -0.3053208  | -0.9062703  | 0.5923077  | 0.7488158  |
| <b>DRUG METABOLISM OTHER ENZYMES</b>                        | 39  | -0.30631727 | -0.898475   | 0.6105675  | 0.755737   |
| <b>T CELL RECEPTOR SIGNALING PATHWAY</b>                    | 92  | -0.26117206 | -0.88521665 | 0.58171207 | 0.77357084 |
| <b>BUTANOATE METABOLISM</b>                                 | 30  | -0.35817483 | -0.882406   | 0.62896824 | 0.76976794 |
| <b>TERPENOID BACKBONE BIOSYNTHESIS</b>                      | 15  | -0.365085   | -0.8818788  | 0.6188605  | 0.76160514 |
| <b>SYSTEMIC LUPUS ERYTHEMATOSUS</b>                         | 88  | -0.31776744 | -0.88100976 | 0.6051081  | 0.7542704  |
| <b>LYSOSOME</b>                                             | 117 | -0.23417728 | -0.87776816 | 0.6113281  | 0.7519492  |
| <b>ECM RECEPTOR INTERACTION</b>                             | 70  | -0.33946648 | -0.86563253 | 0.64656967 | 0.7670777  |
| <b>RNA POLYMERASE</b>                                       | 27  | -0.26543185 | -0.86558276 | 0.63723606 | 0.75846314 |
| <b>TYPE I DIABETES MELLITUS</b>                             | 32  | -0.40558252 | -0.8645699  | 0.6372549  | 0.75184464 |
| <b>TOLL LIKE RECEPTOR SIGNALING PATHWAY</b>                 | 76  | -0.2723002  | -0.86427546 | 0.63527054 | 0.74425393 |
| <b>AUTOIMMUNE THYROID DISEASE</b>                           | 34  | -0.40742585 | -0.8585488  | 0.6356275  | 0.7463378  |
| <b>JAK STAT SIGNALING PATHWAY</b>                           | 114 | -0.24149683 | -0.84474975 | 0.6859504  | 0.7643172  |
| <b>GALACTOSE METABOLISM</b>                                 | 20  | -0.24985434 | -0.8222984  | 0.67701864 | 0.79740804 |
| <b>DORSO VENTRAL AXIS FORMATION</b>                         | 23  | -0.27150398 | -0.81813145 | 0.68136275 | 0.7966562  |
| <b>ASTHMA</b>                                               | 21  | -0.38351947 | -0.7867748  | 0.7321063  | 0.8421756  |
| <b>PEROXISOME</b>                                           | 67  | -0.2196404  | -0.7829821  | 0.7924528  | 0.8402849  |
| <b>INTESTINAL IMMUNE NETWORK FOR IGA PRODUCTION</b>         | 34  | -0.34740373 | -0.7700342  | 0.7526427  | 0.85196656 |
| <b>PATHOGENIC ESCHERICHIA COLI INFECTION</b>                | 50  | -0.2641702  | -0.7688507  | 0.7628866  | 0.8450977  |
| <b>O GLYCAN BIOSYNTHESIS</b>                                | 19  | -0.28100225 | -0.75185394 | 0.8367347  | 0.8638152  |
| <b>VIBRIO CHOLERAE INFECTION</b>                            | 51  | -0.19520424 | -0.7430977  | 0.8526971  | 0.868085   |
| <b>TASTE TRANSDUCTION</b>                                   | 25  | -0.2806909  | -0.72318774 | 0.8623482  | 0.88615614 |
| <b>STEROID BIOSYNTHESIS</b>                                 | 16  | -0.2878557  | -0.7064701  | 0.83657587 | 0.8987915  |
| <b>CYTOSOLIC DNA SENSING PATHWAY</b>                        | 42  | -0.2202738  | -0.6797214  | 0.86875    | 0.92031956 |
| <b>CELL CYCLE</b>                                           | 108 | -0.17019337 | -0.63154733 | 0.9644269  | 0.9548837  |
| <b>GLYCOSYLPHOSPHATIDYLINOSITOL GPI ANCHOR BIOSYNTHESIS</b> | 24  | -0.20134689 | -0.5982353  | 0.868      | 0.9676463  |
| <b>PROTEASOME</b>                                           | 41  | -0.16021891 | -0.54751354 | 0.8828125  | 0.97920084 |

**Supplementary Table S14: GSEA of KEGG-pathways in the main cohort, enrichment in ERG<sub>high</sub>**

| <b>PATHWAY</b>                                     | <b>SIZE</b> | <b>ES</b> | <b>NES</b> | <b>NOM <i>p</i>-val</b> | <b>FDR <i>q</i>-val</b> |
|----------------------------------------------------|-------------|-----------|------------|-------------------------|-------------------------|
| NOTCH SIGNALING PATHWAY                            | 44          | 0.570646  | 1.8939956  | 0                       | 0.055041593             |
| PENTOSE AND GLUCURONATE INTERCONVERSIONS           | 22          | 0.539804  | 1.477712   | 0.07157895              | 1                       |
| CITRATE CYCLE TCA CYCLE                            | 31          | 0.379956  | 1.4168941  | 0.097087376             | 1                       |
| SPLICEOSOME                                        | 106         | 0.315289  | 1.4022022  | 0.15665236              | 1                       |
| ENDOMETRIAL CANCER                                 | 45          | 0.37221   | 1.3950136  | 0.084337346             | 0.9674002               |
| GLYCOSAMINOGLYCAN DEGRADATION                      | 19          | 0.442775  | 1.3926028  | 0.120527305             | 0.8168873               |
| RNA DEGRADATION                                    | 52          | 0.31642   | 1.3648297  | 0.15400411              | 0.82250255              |
| TYPE II DIABETES MELLITUS                          | 32          | 0.417495  | 1.3610706  | 0.057692308             | 0.7334166               |
| ETHER LIPID METABOLISM                             | 23          | 0.463213  | 1.2851268  | 0.14164905              | 0.97442824              |
| SPHINGOLIPID METABOLISM                            | 33          | 0.407494  | 1.283116   | 0.092929296             | 0.88598776              |
| N GLYCAN BIOSYNTHESIS                              | 43          | 0.387991  | 1.2674928  | 0.21501014              | 0.86686134              |
| ADIPOCYTOKINE SIGNALING PATHWAY                    | 56          | 0.352025  | 1.2573285  | 0.11890838              | 0.83355254              |
| ABC TRANSPORTERS                                   | 35          | 0.405498  | 1.2435976  | 0.17958412              | 0.81864834              |
| SELENOAMINO ACID METABOLISM                        | 21          | 0.420925  | 1.2259183  | 0.25940594              | 0.82157844              |
| VEGF SIGNALING PATHWAY                             | 61          | 0.344259  | 1.2232822  | 0.16765286              | 0.77542835              |
| GLYCOSAMINOGLYCAN BIOSYNTHESIS HEPARAN SULFATE     | 20          | 0.382288  | 1.219865   | 0.19569471              | 0.73947895              |
| NITROGEN METABOLISM                                | 16          | 0.533677  | 1.219607   | 0.1902834               | 0.6969087               |
| PURINE METABOLISM                                  | 137         | 0.295115  | 1.2109817  | 0.15090543              | 0.68312067              |
| GLYCEROLIPID METABOLISM                            | 38          | 0.354304  | 1.1863607  | 0.17751479              | 0.720392                |
| BASE EXCISION REPAIR                               | 32          | 0.315088  | 1.1661458  | 0.24395162              | 0.7446007               |
| PROGESTERONE MEDIATED OOCYTE MATURATION            | 74          | 0.331903  | 1.1658318  | 0.248                   | 0.7097456               |
| AMINOACYL TRNA BIOSYNTHESIS                        | 40          | 0.340565  | 1.1531861  | 0.3215859               | 0.7137402               |
| LYSINE DEGRADATION                                 | 41          | 0.305711  | 1.136898   | 0.27131784              | 0.72547805              |
| ERBB SIGNALING PATHWAY                             | 74          | 0.268035  | 1.1329427  | 0.23326571              | 0.7061263               |
| LONG TERM DEPRESSION                               | 53          | 0.325049  | 1.1232173  | 0.26185566              | 0.70176786              |
| CHRONIC MYELOID LEUKEMIA                           | 65          | 0.289681  | 1.1228493  | 0.29545453              | 0.6758072               |
| GAP JUNCTION                                       | 73          | 0.349332  | 1.1220355  | 0.29400387              | 0.6528848               |
| GLYCOSAMINOGLYCAN BIOSYNTHESIS CHONDROITIN SULFATE | 19          | 0.43838   | 1.1136811  | 0.30812854              | 0.6488753               |
| UBIQUITIN MEDIATED PROTEOLYSIS                     | 127         | 0.247331  | 1.1013335  | 0.3417191               | 0.6578307               |
| INSULIN SIGNALING PATHWAY                          | 114         | 0.258285  | 1.1009762  | 0.3029703               | 0.63664                 |
| RIBOSOME                                           | 82          | 0.305605  | 1.0945854  | 0.37787056              | 0.63081235              |
| PROTEIN EXPORT                                     | 22          | 0.379509  | 1.0859424  | 0.39918533              | 0.6306105               |
| VASOPRESSIN REGULATED WATER REABSORPTION           | 38          | 0.288508  | 1.0723445  | 0.3472222               | 0.64245826              |
| GLYOXYLATE AND DICARBOXYLATE METABOLISM            | 15          | 0.368145  | 1.0647148  | 0.4090909               | 0.63977957              |
| BLADDER CANCER                                     | 41          | 0.338338  | 1.0609249  | 0.3580786               | 0.62997067              |
| GLYCEROPHOSPHOLIPID METABOLISM                     | 59          | 0.260367  | 1.0561461  | 0.36507937              | 0.622571                |
| PENTOSE PHOSPHATE PATHWAY                          | 24          | 0.308604  | 1.024085   | 0.44421053              | 0.6753275               |
| ACUTE MYELOID LEUKEMIA                             | 53          | 0.268619  | 1.0056236  | 0.43217054              | 0.6977903               |
| RIG I LIKE RECEPTOR SIGNALING PATHWAY              | 54          | 0.284634  | 1.003308   | 0.44399184              | 0.6847781               |



|                                                    |     |          |            |            |            |
|----------------------------------------------------|-----|----------|------------|------------|------------|
| <b>GLYCINE SERINE AND THREONINE METABOLISM</b>     | 29  | 0.363609 | 0.99739045 | 0.4529058  | 0.67987096 |
| <b>NEUROACTIVE LIGAND RECEPTOR INTERACTION</b>     | 144 | 0.290831 | 0.9860564  | 0.4940476  | 0.6868037  |
| <b>MISMATCH REPAIR</b>                             | 22  | 0.296132 | 0.97391146 | 0.47268906 | 0.69548035 |
| <b>STARCH AND SUCROSE METABOLISM</b>               | 38  | 0.297813 | 0.96517473 | 0.53195876 | 0.6982206  |
| <b>GNRH SIGNALING PATHWAY</b>                      | 84  | 0.261413 | 0.95846295 | 0.53154874 | 0.69538563 |
| <b>THYROID CANCER</b>                              | 29  | 0.288496 | 0.9438243  | 0.5331992  | 0.7112361  |
| <b>OOCYTE MEIOSIS</b>                              | 98  | 0.252336 | 0.94085276 | 0.5365854  | 0.7022131  |
| <b>BASAL TRANSCRIPTION FACTORS</b>                 | 28  | 0.243772 | 0.91830355 | 0.5484536  | 0.7325656  |
| <b>ONE CARBON POOL BY FOLATE</b>                   | 16  | 0.356132 | 0.9163467  | 0.552521   | 0.7210434  |
| <b>NON SMALL CELL LUNG CANCER</b>                  | 50  | 0.249019 | 0.9008779  | 0.5807087  | 0.7362479  |
| <b>TGF BETA SIGNALING PATHWAY</b>                  | 71  | 0.297991 | 0.88788795 | 0.6529081  | 0.74723715 |
| <b>SMALL CELL LUNG CANCER</b>                      | 77  | 0.248611 | 0.87011284 | 0.6429942  | 0.7668747  |
| <b>REGULATION OF AUTOPHAGY</b>                     | 24  | 0.226453 | 0.8181001  | 0.70623744 | 0.85259765 |
| <b>AMINO SUGAR AND NUCLEOTIDE SUGAR METABOLISM</b> | 41  | 0.236854 | 0.80509555 | 0.7211155  | 0.8610756  |
| <b>ALZHEIMERS DISEASE</b>                          | 141 | 0.201338 | 0.8043591  | 0.69246435 | 0.8465044  |
| <b>AMYOTROPHIC LATERAL SCLEROSIS ALS</b>           | 44  | 0.249455 | 0.75974053 | 0.82077396 | 0.9104104  |
| <b>ALANINE ASPARTATE AND GLUTAMATE METABOLISM</b>  | 28  | 0.253045 | 0.73419213 | 0.8477801  | 0.93348867 |
| <b>CYSTEINE AND METHIONINE METABOLISM</b>          | 29  | 0.212136 | 0.72075784 | 0.8646465  | 0.9367848  |
| <b>HOMOLOGOUS RECOMBINATION</b>                    | 24  | 0.218325 | 0.7071195  | 0.8479657  | 0.9396755  |
| <b>FRUCTOSE AND MANNOSE METABOLISM</b>             | 30  | 0.222205 | 0.70003974 | 0.88957053 | 0.93191516 |
| <b>BIOSYNTHESIS OF UNSATURATED FATTY ACIDS</b>     | 20  | 0.278155 | 0.6484301  | 0.8965517  | 0.97063565 |
| <b>NUCLEOTIDE EXCISION REPAIR</b>                  | 42  | 0.1579   | 0.6299698  | 0.9227557  | 0.97013724 |
| <b>DNA REPLICATION</b>                             | 36  | 0.18302  | 0.5928331  | 0.9354839  | 0.9776261  |
| <b>OLFACTORY TRANSDUCTION</b>                      | 131 | 0.168927 | 0.4935225  | 0.989899   | 0.99249303 |

**Supplementary Table S15: GSEA of KEGG-pathways in the main cohort, low Gleason (Gleason  $\leq 3 + 4$ ) samples, enrichment in ERG<sub>low</sub>**

| <b>PATHWAY</b>                                                    | <b>SIZE</b> | <b>ES</b> | <b>NES</b> | <b>NOM <i>p</i>-val</b> | <b>FDR <i>q</i>-val</b> |
|-------------------------------------------------------------------|-------------|-----------|------------|-------------------------|-------------------------|
| <b>FATTY ACID METABOLISM</b>                                      | 35          | -0.5748   | -1.75733   | 0.003976                | 0.428658                |
| <b>VALINE LEUCINE AND ISOLEUCINE DEGRADATION</b>                  | 44          | -0.67001  | -1.73347   | 0.006342                | 0.270427                |
| <b>GLYCOLYSIS GLUCONEOGENESIS</b>                                 | 56          | -0.53319  | -1.7318    | 0.00396                 | 0.183222                |
| <b>DRUG METABOLISM CYTOCHROME P450</b>                            | 55          | -0.64306  | -1.6711    | 0.002024                | 0.243507                |
| <b>PROPANOATE METABOLISM</b>                                      | 31          | -0.53258  | -1.66536   | 0.037815                | 0.209191                |
| <b>HEMATOPOIETIC CELL LINEAGE</b>                                 | 68          | -0.65124  | -1.63053   | 0                       | 0.240902                |
| <b>PPAR SIGNALING PATHWAY</b>                                     | 51          | -0.56741  | -1.58869   | 0.002151                | 0.294395                |
| <b>TYROSINE METABOLISM</b>                                        | 31          | -0.55823  | -1.51035   | 0.022587                | 0.467732                |
| <b>HISTIDINE METABOLISM</b>                                       | 24          | -0.62194  | -1.50656   | 0.026639                | 0.430377                |
| <b>GLUTATHIONE METABOLISM</b>                                     | 45          | -0.55473  | -1.49415   | 0.056863                | 0.42461                 |
| <b>BETA ALANINE METABOLISM</b>                                    | 19          | -0.62699  | -1.49271   | 0.056604                | 0.389144                |
| <b>METABOLISM OF XENOBIOTICS BY CYTOCHROME P450</b>               | 50          | -0.53636  | -1.48458   | 0.02988                 | 0.377124                |
| <b>RETINOL METABOLISM</b>                                         | 40          | -0.52352  | -1.47665   | 0.02268                 | 0.369106                |
| <b>CARDIAC MUSCLE CONTRACTION</b>                                 | 58          | -0.54267  | -1.4481    | 0.076152                | 0.417485                |
| <b>HYPERTROPHIC CARDIOMYOPATHY HCM</b>                            | 66          | -0.54303  | -1.43106   | 0.057613                | 0.436884                |
| <b>PYRUVATE METABOLISM</b>                                        | 38          | -0.3643   | -1.41729   | 0.085774                | 0.44844                 |
| <b>DILATED CARDIOMYOPATHY</b>                                     | 73          | -0.52784  | -1.39136   | 0.08125                 | 0.498288                |
| <b>NICOTINATE AND NICOTINAMIDE METABOLISM</b>                     | 19          | -0.63499  | -1.37941   | 0.079399                | 0.50922                 |
| <b>ARACHIDONIC ACID METABOLISM</b>                                | 40          | -0.49731  | -1.36389   | 0.025105                | 0.526413                |
| <b>VIRAL MYOCARDITIS</b>                                          | 62          | -0.52378  | -1.36242   | 0.130952                | 0.50457                 |
| <b>CELL ADHESION MOLECULES CAMS</b>                               | 112         | -0.51387  | -1.34666   | 0.116564                | 0.523981                |
| <b>B CELL RECEPTOR SIGNALING PATHWAY</b>                          | 70          | -0.41894  | -1.3323    | 0.165975                | 0.54144                 |
| <b>BUTANOATE METABOLISM</b>                                       | 30          | -0.50098  | -1.32435   | 0.136821                | 0.540635                |
| <b>PRIMARY IMMUNODEFICIENCY</b>                                   | 29          | -0.59903  | -1.31789   | 0.184874                | 0.535373                |
| <b>PROXIMAL TUBULE BICARBONATE RECLAMATION</b>                    | 18          | -0.4973   | -1.30566   | 0.121339                | 0.549594                |
| <b>FC EPSILON RI SIGNALING PATHWAY</b>                            | 62          | -0.39485  | -1.29086   | 0.122699                | 0.572681                |
| <b>VASCULAR SMOOTH MUSCLE CONTRACTION</b>                         | 89          | -0.39253  | -1.2908    | 0.164905                | 0.551471                |
| <b>REGULATION OF ACTIN CYTOSKELETON</b>                           | 176         | -0.34923  | -1.28702   | 0.145791                | 0.541866                |
| <b>GLYCOSPHINGOLIPID BIOSYNTHESIS LACTO AND NEOLACTO SERIES</b>   | 17          | -0.49558  | -1.28193   | 0.158635                | 0.535908                |
| <b>LEISHMANIA INFECTION</b>                                       | 58          | -0.48024  | -1.26      | 0.188017                | 0.579365                |
| <b>OXIDATIVE PHOSPHORYLATION</b>                                  | 107         | -0.25188  | -1.25928   | 0.223158                | 0.563622                |
| <b>LINOLEIC ACID METABOLISM</b>                                   | 16          | -0.52279  | -1.25469   | 0.152361                | 0.556829                |
| <b>PHENYLALANINE METABOLISM</b>                                   | 17          | -0.5513   | -1.25461   | 0.163223                | 0.540131                |
| <b>LEUKOCYTE TRANSENDOTHELIAL MIGRATION</b>                       | 94          | -0.42807  | -1.25319   | 0.160825                | 0.527582                |
| <b>ADHERENS JUNCTION</b>                                          | 62          | -0.35074  | -1.24188   | 0.177291                | 0.539059                |
| <b>NATURAL KILLER CELL MEDIATED CYTOTOXICITY</b>                  | 101         | -0.40518  | -1.24066   | 0.214592                | 0.527223                |
| <b>EPITHELIAL CELL SIGNALING IN HELICOBACTER PYLORI INFECTION</b> | 65          | -0.28888  | -1.24058   | 0.131466                | 0.5131                  |
| <b>PARKINSONS DISEASE</b>                                         | 103         | -0.26831  | -1.24027   | 0.235294                | 0.500656                |
| <b>FC GAMMA R MEDIATED PHAGOCYTOSIS</b>                           | 83          | -0.34748  | -1.22995   | 0.207039                | 0.512762                |
| <b>CHEMOKINE SIGNALING PATHWAY</b>                                | 152         | -0.39003  | -1.22606   | 0.202479                | 0.509208                |
| <b>FOCAL ADHESION</b>                                             | 168         | -0.37517  | -1.22213   | 0.194861                | 0.505357                |
| <b>PHOSPHATIDYLINOSITOL SIGNALING SYSTEM</b>                      | 65          | -0.34458  | -1.2177    | 0.169661                | 0.50295                 |



|                                                             |     |          |          |          |          |
|-------------------------------------------------------------|-----|----------|----------|----------|----------|
| <b>PANCREATIC CANCER</b>                                    | 63  | -0.34855 | -1.21172 | 0.208511 | 0.505366 |
| <b>ENDOCYTOSIS</b>                                          | 156 | -0.28012 | -1.20086 | 0.170782 | 0.517217 |
| <b>ANTIGEN PROCESSING AND PRESENTATION</b>                  | 65  | -0.46206 | -1.19376 | 0.287234 | 0.522465 |
| <b>PYRIMIDINE METABOLISM</b>                                | 90  | -0.2891  | -1.18693 | 0.221766 | 0.525949 |
| <b>ARGININE AND PROLINE METABOLISM</b>                      | 46  | -0.40073 | -1.18367 | 0.189655 | 0.522112 |
| <b>PRION DISEASES</b>                                       | 30  | -0.43579 | -1.18351 | 0.240816 | 0.511485 |
| <b>ASCORBATE AND ALDARATE METABOLISM</b>                    | 18  | -0.47857 | -1.18189 | 0.273092 | 0.504342 |
| <b>SYSTEMIC LUPUS ERYTHEMATOSUS</b>                         | 88  | -0.41173 | -1.17882 | 0.237323 | 0.500253 |
| <b>STEROID HORMONE BIOSYNTHESIS</b>                         | 36  | -0.43597 | -1.17244 | 0.224    | 0.503355 |
| <b>WNT SIGNALING PATHWAY</b>                                | 129 | -0.31684 | -1.1669  | 0.225873 | 0.505087 |
| <b>TIGHT JUNCTION</b>                                       | 106 | -0.32125 | -1.14441 | 0.243083 | 0.543737 |
| <b>MTOR SIGNALING PATHWAY</b>                               | 43  | -0.29399 | -1.14222 | 0.273101 | 0.537842 |
| <b>MELANOGENESIS</b>                                        | 82  | -0.34923 | -1.13872 | 0.264151 | 0.535669 |
| <b>GLYCEROLIPID METABOLISM</b>                              | 38  | -0.33329 | -1.12194 | 0.278481 | 0.561586 |
| <b>LYSOSOME</b>                                             | 117 | -0.28709 | -1.1122  | 0.317328 | 0.571848 |
| <b>MAPK SIGNALING PATHWAY</b>                               | 218 | -0.28331 | -1.10765 | 0.269737 | 0.571201 |
| <b>ALDOSTERONE REGULATED SODIUM REABSORPTION</b>            | 33  | -0.45758 | -1.10048 | 0.335541 | 0.576414 |
| <b>INOSITOL PHOSPHATE METABOLISM</b>                        | 49  | -0.31283 | -1.09895 | 0.331959 | 0.569941 |
| <b>TOLL LIKE RECEPTOR SIGNALING PATHWAY</b>                 | 76  | -0.32024 | -1.09699 | 0.316222 | 0.565621 |
| <b>COLORECTAL CANCER</b>                                    | 54  | -0.29807 | -1.08723 | 0.327766 | 0.575742 |
| <b>SNARE INTERACTIONS IN VESICULAR TRANSPORT</b>            | 34  | -0.3634  | -1.07756 | 0.382892 | 0.586732 |
| <b>TYPE I DIABETES MELLITUS</b>                             | 32  | -0.52346 | -1.07534 | 0.40257  | 0.582921 |
| <b>APOPTOSIS</b>                                            | 75  | -0.26781 | -1.06279 | 0.335484 | 0.600432 |
| <b>VIBRIO CHOLERAЕ INFECTION</b>                            | 51  | -0.26823 | -1.06249 | 0.331276 | 0.591874 |
| <b>CYTOKINE CYTOKINE RECEPTOR INTERACTION</b>               | 183 | -0.35607 | -1.05478 | 0.377682 | 0.598656 |
| <b>TRYPTOPHAN METABOLISM</b>                                | 33  | -0.40505 | -1.05363 | 0.368973 | 0.592153 |
| <b>CALCIUM SIGNALING PATHWAY</b>                            | 124 | -0.31068 | -1.05021 | 0.368644 | 0.590896 |
| <b>HEDGEHOG SIGNALING PATHWAY</b>                           | 39  | -0.38985 | -1.04884 | 0.378099 | 0.584801 |
| <b>T CELL RECEPTOR SIGNALING PATHWAY</b>                    | 92  | -0.28932 | -1.04161 | 0.397872 | 0.591842 |
| <b>AUTOIMMUNE THYROID DISEASE</b>                           | 34  | -0.49558 | -1.04001 | 0.440426 | 0.586462 |
| <b>ASTHMA</b>                                               | 21  | -0.50737 | -1.03382 | 0.428571 | 0.59034  |
| <b>ALLOGRAFT REJECTION</b>                                  | 26  | -0.54805 | -1.0317  | 0.471215 | 0.586535 |
| <b>AXON GUIDANCE</b>                                        | 119 | -0.27966 | -1.03134 | 0.36646  | 0.579415 |
| <b>JAK STAT SIGNALING PATHWAY</b>                           | 114 | -0.28618 | -1.02503 | 0.417671 | 0.584776 |
| <b>ARRHYTHMOGENIC RIGHT VENTRICULAR CARDIOMYOPATHY ARVC</b> | 59  | -0.34725 | -1.02209 | 0.430353 | 0.582792 |
| <b>GLIOMA</b>                                               | 57  | -0.28234 | -1.02111 | 0.436059 | 0.57718  |
| <b>COMPLEMENT AND COAGULATION CASCADES</b>                  | 52  | -0.42698 | -1.02096 | 0.448637 | 0.570092 |
| <b>STARCH AND SUCROSE METABOLISM</b>                        | 38  | -0.316   | -1.02012 | 0.415612 | 0.564567 |
| <b>GRAFT VERSUS HOST DISEASE</b>                            | 31  | -0.50635 | -1.01979 | 0.487288 | 0.558214 |
| <b>GAP JUNCTION</b>                                         | 73  | -0.30982 | -1.01693 | 0.409871 | 0.556332 |
| <b>ADIPOCYTOKINE SIGNALING PATHWAY</b>                      | 56  | -0.27146 | -1.01226 | 0.435374 | 0.558633 |
| <b>PATHWAYS IN CANCER</b>                                   | 279 | -0.25379 | -1.00408 | 0.418605 | 0.567434 |
| <b>LONG TERM DEPRESSION</b>                                 | 53  | -0.29765 | -0.99491 | 0.431535 | 0.577069 |
| <b>NON SMALL CELL LUNG CANCER</b>                           | 50  | -0.27431 | -0.99275 | 0.494759 | 0.574468 |
| <b>PATHOGENIC ESCHERICHIA COLI INFECTION</b>                | 50  | -0.32015 | -0.9716  | 0.483607 | 0.606761 |
| <b>GNRH SIGNALING PATHWAY</b>                               | 84  | -0.26309 | -0.96915 | 0.493802 | 0.605055 |

|                                                             |     |          |          |          |          |
|-------------------------------------------------------------|-----|----------|----------|----------|----------|
| <b>MELANOMA</b>                                             | 58  | -0.27091 | -0.95161 | 0.561181 | 0.630692 |
| <b>LONG TERM POTENTIATION</b>                               | 60  | -0.27998 | -0.9468  | 0.544699 | 0.632693 |
| <b>FRUCTOSE AND MANNOSE METABOLISM</b>                      | 30  | -0.29582 | -0.94543 | 0.543651 | 0.628576 |
| <b>GLYCEROPHOSPHOLIPID METABOLISM</b>                       | 59  | -0.23849 | -0.93851 | 0.57551  | 0.635078 |
| <b>HUNTINGTONS DISEASE</b>                                  | 157 | -0.19111 | -0.93586 | 0.507592 | 0.633028 |
| <b>RENAL CELL CARCINOMA</b>                                 | 61  | -0.25307 | -0.93248 | 0.541667 | 0.632276 |
| <b>BASAL CELL CARCINOMA</b>                                 | 40  | -0.31747 | -0.92139 | 0.60334  | 0.64651  |
| <b>ALZHEIMERS DISEASE</b>                                   | 141 | -0.22165 | -0.9201  | 0.53139  | 0.642262 |
| <b>VEGF SIGNALING PATHWAY</b>                               | 61  | -0.25292 | -0.91574 | 0.622129 | 0.643416 |
| <b>TERPENOID BACKBONE BIOSYNTHESIS</b>                      | 15  | -0.36513 | -0.90732 | 0.578189 | 0.650887 |
| <b>PROSTATE CANCER</b>                                      | 83  | -0.24162 | -0.90552 | 0.597895 | 0.647442 |
| <b>PORPHYRIN AND CHLOROPHYLL METABOLISM</b>                 | 33  | -0.30215 | -0.89355 | 0.612774 | 0.662094 |
| <b>PEROXISOME</b>                                           | 67  | -0.24244 | -0.88397 | 0.659919 | 0.67278  |
| <b>AMINO SUGAR AND NUCLEOTIDE SUGAR METABOLISM</b>          | 41  | -0.24287 | -0.88212 | 0.675676 | 0.669515 |
| <b>GALACTOSE METABOLISM</b>                                 | 20  | -0.2704  | -0.87744 | 0.612971 | 0.671198 |
| <b>DRUG METABOLISM OTHER ENZYMES</b>                        | 39  | -0.30971 | -0.87682 | 0.638211 | 0.665909 |
| <b>INTESTINAL IMMUNE NETWORK FOR IGA PRODUCTION</b>         | 34  | -0.3731  | -0.84708 | 0.645435 | 0.711469 |
| <b>STEROID BIOSYNTHESIS</b>                                 | 16  | -0.34029 | -0.81211 | 0.696121 | 0.764039 |
| <b>RNA POLYMERASE</b>                                       | 27  | -0.23329 | -0.79392 | 0.72211  | 0.787158 |
| <b>P53 SIGNALING PATHWAY</b>                                | 61  | -0.25305 | -0.78393 | 0.795031 | 0.796277 |
| <b>ALANINE ASPARTATE AND GLUTAMATE METABOLISM</b>           | 28  | -0.26272 | -0.78148 | 0.796334 | 0.792567 |
| <b>BIOSYNTHESIS OF UNSATURATED FATTY ACIDS</b>              | 20  | -0.30046 | -0.72265 | 0.814196 | 0.869183 |
| <b>GLYCOSYLPHOSPHATIDYLINOSITOL GPI ANCHOR BIOSYNTHESIS</b> | 24  | -0.20336 | -0.65816 | 0.869121 | 0.929164 |
| <b>PROTEASOME</b>                                           | 41  | -0.12487 | -0.47125 | 0.949686 | 0.995191 |

**Supplementary Table S16: GSEA of KEGG-pathways in the main cohort, low Gleason (Gleason  $\leq 3 + 4$ ) samples, enrichment in ERG<sub>high</sub>**

| <b>PATHWAY</b>                                     | <b>SIZE</b> | <b>ES</b> | <b>NES</b> | <b>NOM <i>p</i>-val</b> | <b>FDR <i>q</i>-val</b> |
|----------------------------------------------------|-------------|-----------|------------|-------------------------|-------------------------|
| NOTCH SIGNALING PATHWAY                            | 44          | 0.516836  | 1.717935   | 0.001942                | 0.301009                |
| AMINOACYL TRNA BIOSYNTHESIS                        | 40          | 0.462563  | 1.56396    | 0.059917                | 0.617156                |
| RNA DEGRADATION                                    | 52          | 0.354821  | 1.419818   | 0.118609                | 1                       |
| NITROGEN METABOLISM                                | 16          | 0.588849  | 1.329333   | 0.118367                | 1                       |
| CITRATE CYCLE TCA CYCLE                            | 31          | 0.329703  | 1.304396   | 0.142342                | 1                       |
| SPHINGOLIPID METABOLISM                            | 33          | 0.417907  | 1.277418   | 0.118952                | 1                       |
| ABC TRANSPORTERS                                   | 35          | 0.413801  | 1.277238   | 0.148148                | 1                       |
| ONE CARBON POOL BY FOLATE                          | 16          | 0.446341  | 1.241598   | 0.219959                | 1                       |
| TYPE II DIABETES MELLITUS                          | 32          | 0.409184  | 1.20927    | 0.201195                | 1                       |
| PENTOSE PHOSPHATE PATHWAY                          | 24          | 0.331508  | 1.207402   | 0.213018                | 1                       |
| GLYOXYLATE AND DICARBOXYLATE METABOLISM            | 15          | 0.400063  | 1.203525   | 0.245902                | 1                       |
| ETHER LIPID METABOLISM                             | 23          | 0.443994  | 1.194557   | 0.198853                | 1                       |
| GLYCOSAMINOGLYCAN BIOSYNTHESIS HEPARAN SULFATE     | 20          | 0.343143  | 1.071101   | 0.349693                | 1                       |
| SPLICEOSOME                                        | 106         | 0.22487   | 1.047405   | 0.391837                | 1                       |
| GLYCOSAMINOGLYCAN DEGRADATION                      | 19          | 0.358777  | 1.041911   | 0.423554                | 1                       |
| N GLYCAN BIOSYNTHESIS                              | 43          | 0.283753  | 1.040282   | 0.413927                | 1                       |
| SMALL CELL LUNG CANCER                             | 77          | 0.299533  | 1.031481   | 0.406977                | 1                       |
| BLADDER CANCER                                     | 41          | 0.317529  | 1.031392   | 0.412121                | 1                       |
| OLFACTORY TRANSDUCTION                             | 131         | 0.321648  | 1.020145   | 0.440162                | 1                       |
| BASE EXCISION REPAIR                               | 32          | 0.27957   | 1.018931   | 0.430672                | 1                       |
| PURINE METABOLISM                                  | 137         | 0.229031  | 1.012979   | 0.449807                | 1                       |
| PENTOSE AND GLUCURONATE INTERCONVERSIONS           | 22          | 0.375712  | 0.980591   | 0.516832                | 1                       |
| NEUROACTIVE LIGAND RECEPTOR INTERACTION            | 144         | 0.287321  | 0.970639   | 0.497154                | 1                       |
| DNA REPLICATION                                    | 36          | 0.306206  | 0.965192   | 0.480808                | 1                       |
| GLYCOSAMINOGLYCAN BIOSYNTHESIS CHONDROITIN SULFATE | 19          | 0.374668  | 0.959322   | 0.517578                | 1                       |
| LYSINE DEGRADATION                                 | 41          | 0.276211  | 0.950357   | 0.538023                | 1                       |
| TGF BETA SIGNALING PATHWAY                         | 71          | 0.323419  | 0.932605   | 0.573674                | 1                       |
| DORSO VENTRAL AXIS FORMATION                       | 23          | 0.318803  | 0.913324   | 0.569573                | 1                       |
| UBIQUITIN MEDIATED PROTEOLYSIS                     | 127         | 0.19352   | 0.909368   | 0.55814                 | 1                       |
| ECM RECEPTOR INTERACTION                           | 70          | 0.341929  | 0.900604   | 0.611632                | 1                       |
| GLYCINE SERINE AND THREONINE METABOLISM            | 29          | 0.31782   | 0.899822   | 0.619718                | 1                       |
| PROGESTERONE MEDIATED OOCYTE MATURATION            | 74          | 0.24859   | 0.88205    | 0.654297                | 1                       |
| MISMATCH REPAIR                                    | 22          | 0.267798  | 0.872425   | 0.608696                | 1                       |
| CELL CYCLE                                         | 108         | 0.229027  | 0.872099   | 0.646943                | 1                       |
| ERBB SIGNALING PATHWAY                             | 74          | 0.192177  | 0.860207   | 0.731313                | 1                       |
| RIG I LIKE RECEPTOR SIGNALING PATHWAY              | 54          | 0.230037  | 0.852649   | 0.697495                | 1                       |
| OOCYTE MEIOSIS                                     | 98          | 0.220263  | 0.847816   | 0.732284                | 1                       |
| VASOPRESSIN REGULATED WATER REABSORPTION           | 38          | 0.240948  | 0.844498   | 0.646341                | 1                       |
| AMYOTROPHIC LATERAL SCLEROSIS ALS                  | 44          | 0.281079  | 0.83691    | 0.672414                | 1                       |

|                                            |     |          |          |          |          |
|--------------------------------------------|-----|----------|----------|----------|----------|
| <b>INSULIN SIGNALING PATHWAY</b>           | 114 | 0.187648 | 0.79114  | 0.801181 | 1        |
| <b>O GLYCAN BIOSYNTHESIS</b>               | 19  | 0.275072 | 0.784538 | 0.810176 | 1        |
| <b>HOMOLOGOUS RECOMBINATION</b>            | 24  | 0.236923 | 0.777339 | 0.755144 | 1        |
| <b>NEUROTROPHIN SIGNALING PATHWAY</b>      | 114 | 0.179373 | 0.77006  | 0.825203 | 1        |
| <b>PROTEIN EXPORT</b>                      | 22  | 0.236003 | 0.764155 | 0.708098 | 1        |
| <b>CYSTEINE AND METHIONINE METABOLISM</b>  | 29  | 0.220384 | 0.753994 | 0.841176 | 1        |
| <b>BASAL TRANSCRIPTION FACTORS</b>         | 28  | 0.19441  | 0.750105 | 0.825203 | 1        |
| <b>SELENOAMINO ACID METABOLISM</b>         | 21  | 0.244671 | 0.747654 | 0.793587 | 0.996678 |
| <b>RIBOSOME</b>                            | 82  | 0.195386 | 0.737388 | 0.690909 | 0.991515 |
| <b>ENDOMETRIAL CANCER</b>                  | 45  | 0.199174 | 0.732926 | 0.799599 | 0.978085 |
| <b>CHRONIC MYELOID LEUKEMIA</b>            | 65  | 0.193513 | 0.729681 | 0.813627 | 0.963081 |
| <b>ACUTE MYELOID LEUKEMIA</b>              | 53  | 0.198753 | 0.728204 | 0.884086 | 0.946406 |
| <b>TASTE TRANSDUCTION</b>                  | 25  | 0.243484 | 0.68766  | 0.948077 | 0.979054 |
| <b>NOD LIKE RECEPTOR SIGNALING PATHWAY</b> | 48  | 0.215297 | 0.672106 | 0.900778 | 0.978148 |
| <b>NUCLEOTIDE EXCISION REPAIR</b>          | 42  | 0.155527 | 0.611816 | 0.902153 | 1        |
| <b>THYROID CANCER</b>                      | 29  | 0.193289 | 0.605692 | 0.926878 | 0.993572 |
| <b>REGULATION OF AUTOPHAGY</b>             | 24  | 0.177812 | 0.605173 | 0.937736 | 0.97612  |
| <b>CYTOSOLIC DNA SENSING PATHWAY</b>       | 42  | 0.143015 | 0.491659 | 0.992481 | 0.99366  |

**Supplementary Table S17: GSEA of KEGG-pathways in the main cohort, high Gleason (Gleason  $\geq 4 + 3$ ) samples, enrichment in ERG<sub>low</sub>**

| <b>PATHWAY</b>                                           | <b>SIZE</b> | <b>ES</b> | <b>NES</b> | <b>NOM <i>p</i>-val</b> | <b>FDR <i>q</i>-val</b> |
|----------------------------------------------------------|-------------|-----------|------------|-------------------------|-------------------------|
| GLUTATHIONE METABOLISM                                   | 45          | -0.58109  | -1.49226   | 0.062753                | 1                       |
| DRUG METABOLISM CYTOCHROME P450                          | 55          | -0.52313  | -1.45852   | 0.018256                | 1                       |
| GLYCOLYSIS GLUCONEOGENESIS                               | 56          | -0.40615  | -1.44262   | 0.053254                | 1                       |
| P53 SIGNALING PATHWAY                                    | 61          | -0.45124  | -1.38952   | 0.070342                | 1                       |
| APOPTOSIS                                                | 75          | -0.33517  | -1.38622   | 0.045455                | 1                       |
| BETA ALANINE METABOLISM                                  | 19          | -0.53945  | -1.33119   | 0.124                   | 1                       |
| ARGININE AND PROLINE METABOLISM                          | 46          | -0.48317  | -1.31523   | 0.110442                | 1                       |
| GLYCOSPHINGOLIPID BIOSYNTHESIS LACTO AND NEOLACTO SERIES | 17          | -0.46753  | -1.30379   | 0.120623                | 1                       |
| HISTIDINE METABOLISM                                     | 24          | -0.54079  | -1.3033    | 0.09                    | 1                       |
| MELANOGENESIS                                            | 82          | -0.38026  | -1.29089   | 0.093361                | 1                       |
| ALDOSTERONE REGULATED SODIUM REABSORPTION                | 33          | -0.53263  | -1.27956   | 0.136095                | 1                       |
| HYPERTROPHIC CARDIOMYOPATHY HCM                          | 66          | -0.43965  | -1.27941   | 0.187373                | 0.9968                  |
| METABOLISM OF XENOBIOTICS BY CYTOCHROME P450             | 50          | -0.43719  | -1.25665   | 0.117647                | 1                       |
| PYRUVATE METABOLISM                                      | 38          | -0.36316  | -1.23956   | 0.208413                | 1                       |
| PROSTATE CANCER                                          | 83          | -0.30743  | -1.21731   | 0.155419                | 1                       |
| MTOR SIGNALING PATHWAY                                   | 43          | -0.30711  | -1.18744   | 0.1917                  | 1                       |
| O GLYCAN BIOSYNTHESIS                                    | 19          | -0.45238  | -1.18317   | 0.239837                | 1                       |
| DILATED CARDIOMYOPATHY                                   | 73          | -0.40563  | -1.18086   | 0.264463                | 1                       |
| TYROSINE METABOLISM                                      | 31          | -0.43806  | -1.17859   | 0.211765                | 0.984351                |
| PRION DISEASES                                           | 30          | -0.44281  | -1.17312   | 0.29505                 | 0.957145                |
| CARDIAC MUSCLE CONTRACTION                               | 58          | -0.34436  | -1.14871   | 0.26938                 | 1                       |
| PPAR SIGNALING PATHWAY                                   | 51          | -0.39044  | -1.12762   | 0.262425                | 1                       |
| GLIOMA                                                   | 57          | -0.31679  | -1.12513   | 0.25102                 | 1                       |
| TASTE TRANSDUCTION                                       | 25          | -0.42644  | -1.07992   | 0.373016                | 1                       |
| STEROID HORMONE BIOSYNTHESIS                             | 36          | -0.37043  | -1.07989   | 0.325671                | 1                       |
| FATTY ACID METABOLISM                                    | 35          | -0.3198   | -1.07466   | 0.351515                | 1                       |
| PYRIMIDINE METABOLISM                                    | 90          | -0.26562  | -1.07115   | 0.339286                | 1                       |
| CYSTEINE AND METHIONINE METABOLISM                       | 29          | -0.31216  | -1.0571    | 0.397895                | 1                       |
| HEMATOPOIETIC CELL LINEAGE                               | 68          | -0.42636  | -1.046     | 0.397638                | 1                       |
| TRYPTOPHAN METABOLISM                                    | 33          | -0.39935  | -1.03939   | 0.393375                | 1                       |
| NICOTINATE AND NICOTINAMIDE METABOLISM                   | 19          | -0.4544   | -1.03812   | 0.371717                | 1                       |
| VALINE LEUCINE AND ISOLEUCINE DEGRADATION                | 44          | -0.38296  | -1.03049   | 0.423387                | 1                       |
| PROXIMAL TUBULE BICARBONATE RECLAMATION                  | 18          | -0.39738  | -1.0253    | 0.41966                 | 0.996142                |
| GLYCINE SERINE AND THREONINE METABOLISM                  | 29          | -0.38587  | -1.01423   | 0.426195                | 1                       |
| ARACHIDONIC ACID METABOLISM                              | 40          | -0.38977  | -0.99708   | 0.441955                | 1                       |
| ARRHYTHMOGENIC RIGHT VENTRICULAR CARDIOMYOPATHY ARVC     | 59          | -0.34466  | -0.98655   | 0.48394                 | 1                       |
| AMYOTROPHIC LATERAL SCLEROSIS ALS                        | 44          | -0.30689  | -0.96829   | 0.48855                 | 1                       |
| PHENYLALANINE METABOLISM                                 | 17          | -0.41873  | -0.96135   | 0.516                   | 1                       |
| LINOLEIC ACID METABOLISM                                 | 16          | -0.39795  | -0.94534   | 0.564777                | 1                       |

|                                                                   |                  |          |          |          |          |
|-------------------------------------------------------------------|------------------|----------|----------|----------|----------|
| <b>NOD LIKE RECEPTOR SIGNALING PATHWAY</b>                        | 48               | -0.31988 | -0.93946 | 0.53229  | 1        |
| <b>OLFACTORY TRANSDUCTION</b>                                     | 131              | -0.33618 | -0.93875 | 0.53816  | 1        |
| <b>ADHERENS JUNCTION</b>                                          | 62               | -0.25968 | -0.93686 | 0.537473 | 1        |
| <b>FOCAL ADHESION</b>                                             | 168              | -0.29155 | -0.93682 | 0.521739 | 1        |
| <b>TERPENOID BACKBONE BIOSYNTHESIS</b>                            | 15               | -0.39638 | -0.93531 | 0.560078 | 0.984399 |
| <b>PROPANOATE METABOLISM</b>                                      | 31               | -0.31655 | -0.92299 | 0.546667 | 0.99571  |
| <b>WNT SIGNALING PATHWAY</b>                                      | 129              | -0.25453 | -0.92235 | 0.572614 | 0.975564 |
| <b>PHOSPHATIDYLINOSITOL SIGNALING SYSTEM</b>                      | 65               | -0.26402 | -0.91989 | 0.566596 | 0.961487 |
| <b>RETINOL METABOLISM</b>                                         | 40               | -0.29044 | -0.91814 | 0.634    | 0.945594 |
| <b>ALANINE ASPARTATE AND GLUTAMATE METABOLISM</b>                 | 28               | -0.32715 | -0.9138  | 0.59802  | 0.936682 |
| <b>CALCIUM SIGNALING PATHWAY</b>                                  | 124              | -0.2778  | -0.91263 | 0.577963 | 0.9206   |
| <b>PATHWAYS IN CANCER</b>                                         | 279              | -0.23088 | -0.9015  | 0.640657 | 0.931577 |
| <b>PORPHYRIN AND CHLOROPHYLL METABOLISM</b>                       | 33               | -0.29245 | -0.89562 | 0.598441 | 0.928584 |
| <b>AXON GUIDANCE</b>                                              | 119              | -0.25724 | -0.89225 | 0.664    | 0.918983 |
| <b>LONG TERM POTENTIATION</b>                                     | 60               | -0.27098 | -0.88623 | 0.655319 | 0.916726 |
| <b>CYTOSOLIC DNA SENSING PATHWAY</b>                              | 42               | -0.28958 | -0.88511 | 0.591356 | 0.902483 |
| <b>DRUG METABOLISM OTHER ENZYMES</b>                              | 39               | -0.29008 | -0.88207 | 0.672549 | 0.893022 |
| <b>PANCREATIC CANCER</b>                                          | 63               | -0.24008 | -0.87586 | 0.667355 | 0.891418 |
| <b>DORSO VENTRAL AXIS FORMATION</b>                               | 23               | -0.26575 | -0.87206 | 0.633401 | 0.884406 |
| <b>VASCULAR SMOOTH MUSCLE CONTRACTION</b>                         | 89               | -0.25807 | -0.84826 | 0.658174 | 0.921096 |
| <b>HEDGEHOG SIGNALING PATHWAY</b>                                 | 39               | -0.30239 | -0.81983 | 0.735537 | 0.968674 |
| <b>COLORECTAL CANCER</b>                                          | 54               | -0.22429 | -0.81853 | 0.772257 | 0.955406 |
| <b>COMPLEMENT AND COAGULATION CASCADES</b>                        | 52               | -0.33958 | -0.8171  | 0.68     | 0.942883 |
| <b>BLADDER CANCER</b>                                             | 41               | -0.26128 | -0.81446 | 0.761044 | 0.933214 |
| <b>HUNTINGTONS DISEASE</b>                                        | 157              | -0.17929 | -0.81213 | 0.683168 | 0.923699 |
| <b>NUCLEOTIDE EXCISION REPAIR</b>                                 | 42               | -0.20196 | -0.80325 | 0.714004 | 0.927309 |
| <b>DNA REPLICATION</b>                                            | 36               | -0.24967 | -0.79526 | 0.678208 | 0.929258 |
| <b>CYTOKINE CYTOKINE RECEPTOR INTERACTION</b>                     | 183              | -0.27434 | -0.7898  | 0.749515 | 0.925759 |
| <b>CHEMOKINE SIGNALING PATHWAY</b>                                | 152              | -0.26392 | -0.77536 | 0.762295 | 0.938934 |
| <b>EPITHELIAL CELL SIGNALING IN HELICOBACTER PYLORI INFECTION</b> | 65               | -0.1986  | -0.76677 | 0.833652 | 0.941243 |
| <b>RENAL CELL CARCINOMA</b>                                       | 61               | -0.20876 | -0.75937 | 0.79065  | 0.940721 |
| <b>CELL CYCLE</b>                                                 | 108              | -0.19763 | -0.7411  | 0.85567  | 0.957485 |
| <b>GALACTOSE METABOLISM</b>                                       | 20               | -0.22163 | -0.73411 | 0.790476 | 0.955116 |
| <b>SMALL CELL LUNG CANCER</b>                                     | 77               | -0.20928 | -0.72354 | 0.89834  | 0.957566 |
| <b>B CELL RECEPTOR SIGNALING PATHWAY</b>                          | 70               | -0.23307 | -0.72088 | 0.819106 | 0.948205 |
| <b>RNA POLYMERASE</b>                                             | 27               | -0.2329  | -0.69867 | 0.792887 | 0.965847 |
| <b>CELL ADHESION MOLECULES CAMS</b>                               | 112              | -0.25326 | -0.66414 | 0.89     | 0.991479 |
| <b>HOMOLOGOUS RECOMBINATION</b>                                   | 24               | -0.19277 | -0.6397  | 0.932939 | 1        |
| <b>PROTEASOME</b>                                                 | 41               | -0.18083 | -0.62023 | 0.806911 | 1        |
| <b>ANTIGEN PROCESSING AND PRESENTATION</b>                        | 65               | -0.22812 | -0.59258 | 0.919075 | 1        |
| <b>PARKINSONS DISEASE</b>                                         | 103              | -0.13483 | -0.57441 | 0.925996 | 1        |
| <b>OXIDATIVE PHOSPHORYLATION</b>                                  | 107              | -0.13049 | -0.55556 | 0.900952 | 0.99953  |
| <b>GLYCOSYLPHOSPHATIDYLINOSITOL ANCHOR BIOSYNTHESIS</b>           | <b>GPI</b><br>24 | -0.17695 | -0.51881 | 0.924419 | 0.998504 |
| <b>AMINOACYL TRNA BIOSYNTHESIS</b>                                | 40               | -0.12514 | -0.40487 | 0.993776 | 0.998799 |



**Supplementary Table S18: GSEA of KEGG-pathways in the main cohort, high Gleason (Gleason  $\geq 4 + 3$ ) samples, enrichment in ERG<sub>high</sub>**

| <b>PATHWAY</b>                                     | <b>SIZE</b> | <b>ES</b>  | <b>NES</b> | <b>NOM <i>p</i>-val</b> | <b>FDR <i>q</i>-val</b> |
|----------------------------------------------------|-------------|------------|------------|-------------------------|-------------------------|
| NOTCH SIGNALING PATHWAY                            | 44          | 0.5045062  | 1.6738925  | 0                       | 0.62938935              |
| PENTOSE AND GLUCURONATE INTERCONVERSIONS           | 22          | 0.5123342  | 1.4166561  | 0.08817204              | 1                       |
| GLYCOSAMINOGLYCAN BIOSYNTHESIS CHONDROITIN SULFATE | 19          | 0.542504   | 1.3943979  | 0.07114624              | 1                       |
| SELENOAMINO ACID METABOLISM                        | 21          | 0.47533673 | 1.3648516  | 0.10714286              | 1                       |
| ENDOMETRIAL CANCER                                 | 45          | 0.36318752 | 1.3550841  | 0.086519115             | 1                       |
| PROTEIN EXPORT                                     | 22          | 0.48945096 | 1.3471158  | 0.19421488              | 1                       |
| SPLICEOSOME                                        | 106         | 0.31644973 | 1.3434168  | 0.17                    | 1                       |
| ETHER LIPID METABOLISM                             | 23          | 0.44876847 | 1.3325243  | 0.06832298              | 1                       |
| GAP JUNCTION                                       | 73          | 0.40344366 | 1.2925855  | 0.13872832              | 1                       |
| LONG TERM DEPRESSION                               | 53          | 0.35514474 | 1.2659172  | 0.1002004               | 1                       |
| TYPE II DIABETES MELLITUS                          | 32          | 0.36255944 | 1.2274318  | 0.15039062              | 1                       |
| UBIQUITIN MEDIATED PROTEOLYSIS                     | 127         | 0.27910286 | 1.227381   | 0.24418604              | 1                       |
| TIGHT JUNCTION                                     | 106         | 0.2995418  | 1.1919937  | 0.18426104              | 1                       |
| GLYOXYLATE AND DICARBOXYLATE METABOLISM            | 15          | 0.41961658 | 1.1883075  | 0.28985506              | 1                       |
| PROGESTERONE MEDIATED OOCYTE MATURATION            | 74          | 0.329471   | 1.171812   | 0.25494072              | 1                       |
| LYSINE DEGRADATION                                 | 41          | 0.2979997  | 1.171253   | 0.19444445              | 1                       |
| ABC TRANSPORTERS                                   | 35          | 0.3798634  | 1.1644273  | 0.2576336               | 1                       |
| RNA DEGRADATION                                    | 52          | 0.2598646  | 1.1500181  | 0.30754352              | 1                       |
| RIBOSOME                                           | 82          | 0.3375702  | 1.129038   | 0.3858586               | 1                       |
| GLYCEROLIPID METABOLISM                            | 38          | 0.3245482  | 1.1109859  | 0.3046092               | 1                       |
| STARCH AND SUCROSE METABOLISM                      | 38          | 0.34416395 | 1.1031003  | 0.32040817              | 1                       |
| GLYCEROPHOSPHOLIPID METABOLISM                     | 59          | 0.2613262  | 1.091921   | 0.28870293              | 1                       |
| RIG I LIKE RECEPTOR SIGNALING PATHWAY              | 54          | 0.3146344  | 1.0732448  | 0.35976788              | 1                       |
| CITRATE CYCLE TCA CYCLE                            | 31          | 0.29832336 | 1.0654979  | 0.39300412              | 1                       |
| VEGF SIGNALING PATHWAY                             | 61          | 0.3033966  | 1.0607156  | 0.37058824              | 1                       |
| SPHINGOLIPID METABOLISM                            | 33          | 0.3293276  | 1.0508296  | 0.35849056              | 1                       |
| PURINE METABOLISM                                  | 137         | 0.26441482 | 1.0403163  | 0.39648438              | 1                       |
| N GLYCAN BIOSYNTHESIS                              | 43          | 0.32496336 | 1.0089209  | 0.45759368              | 1                       |
| VIBRIO CHOLERAЕ INFECTION                          | 51          | 0.2632098  | 0.99514633 | 0.43838385              | 1                       |
| GLYCOSAMINOGLYCAN BIOSYNTHESIS HEPARAN SULFATE     | 20          | 0.3191126  | 0.9949526  | 0.49115914              | 1                       |
| GLYCOSAMINOGLYCAN DEGRADATION                      | 19          | 0.3005399  | 0.965958   | 0.5010309               | 1                       |
| THYROID CANCER                                     | 29          | 0.29003474 | 0.9657133  | 0.5121951               | 1                       |
| BASE EXCISION REPAIR                               | 32          | 0.26781192 | 0.963137   | 0.49707603              | 1                       |
| MISMATCH REPAIR                                    | 22          | 0.303365   | 0.95994514 | 0.5051546               | 1                       |
| ALZHEIMERS DISEASE                                 | 141         | 0.23473425 | 0.94902    | 0.5030303               | 1                       |
| MAPK SIGNALING PATHWAY                             | 218         | 0.2395718  | 0.94869226 | 0.560241                | 1                       |
| BASAL TRANSCRIPTION FACTORS                        | 28          | 0.25926867 | 0.9475964  | 0.5235294               | 1                       |
| NON SMALL CELL LUNG CANCER                         | 50          | 0.27112022 | 0.9459981  | 0.52566737              | 1                       |
| VASOPRESSIN REGULATED WATER REABSORPTION           | 38          | 0.23592153 | 0.93527263 | 0.5808967               | 1                       |
| GNRH SIGNALING PATHWAY                             | 84          | 0.25247583 | 0.92241526 | 0.5753425               | 1                       |
| OOCYTE MEIOSIS                                     | 98          | 0.24481033 | 0.9178716  | 0.5795678               | 1                       |

|                                                     |     |            |            |            |            |
|-----------------------------------------------------|-----|------------|------------|------------|------------|
| <b>ERBB SIGNALING PATHWAY</b>                       | 74  | 0.22490917 | 0.9112399  | 0.6229508  | 1          |
| <b>NEUROACTIVE LIGAND RECEPTOR INTERACTION</b>      | 144 | 0.2674146  | 0.90514165 | 0.68801653 | 1          |
| <b>AMINO SUGAR AND NUCLEOTIDE SUGAR METABOLISM</b>  | 41  | 0.28475586 | 0.89959615 | 0.57758623 | 1          |
| <b>ASCORBATE AND ALDARATE METABOLISM</b>            | 18  | 0.3372187  | 0.887614   | 0.6293996  | 1          |
| <b>TGF BETA SIGNALING PATHWAY</b>                   | 71  | 0.28805873 | 0.8791876  | 0.64176244 | 1          |
| <b>T CELL RECEPTOR SIGNALING PATHWAY</b>            | 92  | 0.27073228 | 0.8785631  | 0.61044174 | 1          |
| <b>PENTOSE PHOSPHATE PATHWAY</b>                    | 24  | 0.27586928 | 0.87095606 | 0.6260504  | 1          |
| <b>ENDOCYTOSIS</b>                                  | 156 | 0.20839994 | 0.86836064 | 0.6947162  | 1          |
| <b>FC EPSILON RI SIGNALING PATHWAY</b>              | 62  | 0.272123   | 0.8679006  | 0.612326   | 1          |
| <b>ADIPOCYTOKINE SIGNALING PATHWAY</b>              | 56  | 0.254351   | 0.8639951  | 0.70726913 | 1          |
| <b>ECM RECEPTOR INTERACTION</b>                     | 70  | 0.33320397 | 0.8552361  | 0.6287425  | 1          |
| <b>TYPE I DIABETES MELLITUS</b>                     | 32  | 0.4039086  | 0.84916973 | 0.64123714 | 1          |
| <b>JAK STAT SIGNALING PATHWAY</b>                   | 114 | 0.24348678 | 0.8405615  | 0.6825397  | 1          |
| <b>SYSTEMIC LUPUS ERYTHEMATOSUS</b>                 | 88  | 0.31594077 | 0.8378146  | 0.69896907 | 1          |
| <b>MELANOMA</b>                                     | 58  | 0.23131153 | 0.8347135  | 0.80846775 | 1          |
| <b>INSULIN SIGNALING PATHWAY</b>                    | 114 | 0.19043854 | 0.83018816 | 0.74810606 | 1          |
| <b>SNARE INTERACTIONS IN VESICULAR TRANSPORT</b>    | 34  | 0.24903408 | 0.82990885 | 0.7033399  | 1          |
| <b>NITROGEN METABOLISM</b>                          | 16  | 0.36240193 | 0.82630676 | 0.7225807  | 1          |
| <b>PEROXISOME</b>                                   | 67  | 0.23194745 | 0.82561415 | 0.7344961  | 0.99797565 |
| <b>REGULATION OF AUTOPHAGY</b>                      | 24  | 0.22092693 | 0.82355046 | 0.7057654  | 0.9860101  |
| <b>BASAL CELL CARCINOMA</b>                         | 40  | 0.28743526 | 0.82145005 | 0.78149605 | 0.97474784 |
| <b>CHRONIC MYELOID LEUKEMIA</b>                     | 65  | 0.20110641 | 0.8113076  | 0.7887324  | 0.981718   |
| <b>NEUROTROPHIN SIGNALING PATHWAY</b>               | 114 | 0.17418417 | 0.81061876 | 0.8224852  | 0.9678766  |
| <b>ASTHMA</b>                                       | 21  | 0.3933154  | 0.79921764 | 0.7057654  | 0.9763035  |
| <b>ONE CARBON POOL BY FOLATE</b>                    | 16  | 0.32356194 | 0.798125   | 0.68604654 | 0.9636205  |
| <b>INOSITOL PHOSPHATE METABOLISM</b>                | 49  | 0.2127568  | 0.7812778  | 0.8507752  | 0.9808415  |
| <b>LYSOSOME</b>                                     | 117 | 0.21278796 | 0.7681107  | 0.8032787  | 0.99078923 |
| <b>BIOSYNTHESIS OF UNSATURATED FATTY ACIDS</b>      | 20  | 0.31573716 | 0.72537094 | 0.8079332  | 1          |
| <b>LEISHMANIA INFECTION</b>                         | 58  | 0.28457937 | 0.7233578  | 0.8353909  | 1          |
| <b>BUTANOATE METABOLISM</b>                         | 30  | 0.28861216 | 0.7105619  | 0.85626286 | 1          |
| <b>PATHOGENIC ESCHERICHIA COLI INFECTION</b>        | 50  | 0.24425834 | 0.70852464 | 0.8627859  | 1          |
| <b>LEUKOCYTE TRANSENDOTHELIAL MIGRATION</b>         | 94  | 0.24133033 | 0.7067604  | 0.8313953  | 1          |
| <b>REGULATION OF ACTIN CYTOSKELETON</b>             | 176 | 0.17993955 | 0.6648534  | 0.9596154  | 1          |
| <b>TOLL LIKE RECEPTOR SIGNALING PATHWAY</b>         | 76  | 0.21081783 | 0.65017754 | 0.9047619  | 1          |
| <b>FC GAMMA R MEDIATED PHAGOCYTOSIS</b>             | 83  | 0.19004686 | 0.6495817  | 0.90335304 | 1          |
| <b>ACUTE MYELOID LEUKEMIA</b>                       | 53  | 0.16568136 | 0.6410138  | 0.9823875  | 1          |
| <b>FRUCTOSE AND MANNOSE METABOLISM</b>              | 30  | 0.19758251 | 0.6064993  | 0.95669293 | 1          |
| <b>NATURAL KILLER CELL MEDIATED CYTOTOXICITY</b>    | 101 | 0.2088917  | 0.6036799  | 0.92622954 | 1          |
| <b>PRIMARY IMMUNODEFICIENCY</b>                     | 29  | 0.29064822 | 0.58000416 | 0.88188976 | 1          |
| <b>ALLOGRAFT REJECTION</b>                          | 26  | 0.3025116  | 0.57801336 | 0.93890023 | 1          |
| <b>INTESTINAL IMMUNE NETWORK FOR IGA PRODUCTION</b> | 34  | 0.261487   | 0.5624501  | 0.94949496 | 1          |
| <b>GRAFT VERSUS HOST DISEASE</b>                    | 31  | 0.26586834 | 0.5504549  | 0.9738956  | 1          |
| <b>STEROID BIOSYNTHESIS</b>                         | 16  | 0.22409485 | 0.55034274 | 0.96825397 | 1          |
| <b>AUTOIMMUNE THYROID DISEASE</b>                   | 34  | 0.26633847 | 0.5500026  | 0.9534413  | 0.98951966 |
| <b>VIRAL MYOCARDITIS</b>                            | 62  | 0.21385355 | 0.5458711  | 0.9785575  | 0.9793871  |



**Supplementary Table S19: Pearson correlations between individual metabolites and selected tissue composition parameters among cancer samples in the main cohort**

| Metabolites     | Cancer content |                 | Stroma content |                 | Benign epithelium content |                 | Relative luminal space |                 |
|-----------------|----------------|-----------------|----------------|-----------------|---------------------------|-----------------|------------------------|-----------------|
|                 | Correlations   | <i>p</i> -value | Correlations   | <i>p</i> -value | Correlations              | <i>p</i> -value | Correlations           | <i>p</i> -value |
| Alanine         | 0.2295         | 0.0253          | -0.2269        | 0.027           | -0.0803                   | 0.439           | -0.0087                | 0.9337          |
| Choline         | 0.5395         | < 0.001         | -0.5233        | < 0.001         | -0.3218                   | 0.0002          | -0.2185                | 0.0132          |
| Citrate         | -0.0618        | 0.5518          | -0.1113        | 0.2828          | 0.2662                    | 0.0091          | 0.436                  | < 0.001         |
| Creatine        | -0.0642        | 0.4699          | 0.0024         | 0.9783          | 0.1075                    | 0.2254          | 0.0397                 | 0.6564          |
| Ethm            | -0.0341        | 0.701           | 0.0277         | 0.7557          | 0.0267                    | 0.7643          | -0.0687                | 0.4412          |
| Glucose         | -0.6205        | < 0.001         | 0.514          | < 0.001         | 0.4716                    | < 0.001         | 0.1263                 | 0.1554          |
| Glutamate       | 0.5898         | < 0.001         | -0.4871        | < 0.001         | -0.45                     | < 0.001         | -0.1672                | 0.0592          |
| Glutamine       | 0.4315         | < 0.001         | -0.3368        | 0.0001          | -0.3519                   | < 0.001         | -0.2222                | 0.0117          |
| Glycine         | -0.4881        | < 0.001         | 0.3687         | < 0.001         | 0.4122                    | < 0.001         | 0.2114                 | 0.0166          |
| GPC             | 0.491          | < 0.001         | -0.4792        | < 0.001         | -0.2894                   | 0.0009          | -0.0006                | 0.9946          |
| GPE             | -0.0362        | 0.6839          | 0.0357         | 0.6876          | 0.0208                    | 0.8146          | -0.0531                | 0.5518          |
| Isoleucine      | 0.2005         | 0.0227          | -0.1439        | 0.1036          | -0.178                    | 0.0436          | -0.1519                | 0.087           |
| Lactate         | 0.4693         | < 0.001         | -0.4064        | < 0.001         | -0.338                    | 0.0001          | -0.1843                | 0.038           |
| Leucine         | 0.368          | < 0.001         | -0.2978        | 0.0006          | -0.2878                   | 0.0009          | -0.2375                | 0.007           |
| Myo-inositol    | 0.0784         | 0.3771          | -0.1006        | 0.2568          | -0.0184                   | 0.8359          | -0.0644                | 0.4704          |
| PCh             | 0.4436         | < 0.001         | -0.2875        | 0.001           | -0.4296                   | < 0.001         | -0.1757                | 0.0472          |
| PE              | 0.3601         | < 0.001         | -0.2105        | 0.0167          | -0.3752                   | < 0.001         | -0.2391                | 0.0066          |
| Putrescine      | -0.3059        | 0.0004          | 0.0277         | 0.7555          | 0.4935                    | < 0.001         | 0.1555                 | 0.0796          |
| Scyllo-inositol | 0.1097         | 0.216           | -0.0281        | 0.752           | -0.1559                   | 0.0776          | 0.0436                 | 0.6254          |
| Spermine        | -0.0485        | 0.6405          | -0.1098        | 0.2897          | 0.2407                    | 0.0188          | 0.4536                 | < 0.001         |
| Succinate       | 0.374          | < 0.001         | -0.3517        | < 0.001         | -0.2358                   | 0.0071          | -0.0454                | 0.6106          |
| Taurine         | -0.0895        | 0.3131          | 0.0881         | 0.3211          | 0.052                     | 0.5586          | -0.1108                | 0.2129          |
| Valine          | 0.2057         | 0.0193          | -0.1288        | 0.1457          | -0.2045                   | 0.0201          | -0.182                 | 0.0398          |

Ethm: Ethanolamine, GPC: Glycerophosphocholine, GPE: Glycerophosphoethanolamine, PCh: Phosphocholine, PE: Phosphoethanolamine.
